# Three Reagents for in-Solution Enrichment of Ancient Human DNA at More than a Million SNPs

Nadin Rohland<sup>1,2,\*</sup>, Swapan Mallick<sup>1,2,3,\*</sup>, Matthew Mah<sup>1,2,3</sup>, Robert Maier<sup>1,2,4</sup>, Nick Patterson<sup>2,4</sup> and David Reich<sup>1,2,3,4</sup>

<sup>1</sup> Department of Genetics, Harvard Medical School, Boston, Massachusetts 02115, USA.

<sup>2</sup> Broad Institute of MIT and Harvard, Cambridge, MA 02142, USA.

<sup>3</sup> Howard Hughes Medical Institute, Boston, MA 02115, USA

<sup>4</sup> Department of Human Evolutionary Biology, Harvard University, Cambridge, MA 02138.

\* Contributed equally: N.R. and S.M.

To whom correspondence should be addressed: N.R. ([nrohland@genetics.med.harvard.edu](mailto:nrohland@genetics.med.harvard.edu)), S.M. ([shop@genetics.med.harvard.edu](mailto:shop@genetics.med.harvard.edu)), D.R. ([reich@genetics.med.harvard.edu](mailto:reich@genetics.med.harvard.edu))

**In-solution enrichment for hundreds of thousands of single nucleotide polymorphisms (SNPs) has been the source of >70% of all genome-scale ancient human DNA data published to date. This approach has made it possible to generate data for one to two orders of magnitude lower cost than random shotgun sequencing, making it economical to study ancient samples with low proportions of human DNA, and increasing the rate of conversion of sampled remains into working data thereby facilitating ethical stewardship of human remains. So far, nearly all ancient DNA data obtained using in-solution enrichment has been generated using a set of bait sequences targeting about 1.24 million SNPs (the ‘1240k reagent’). These sequences were published in 2015, but synthesis of the reagent has been cost-effective for only a few laboratories. In 2021, two companies made available reagents that target the same core set of SNPs along with supplementary content. Here, we test the properties of the three reagents on a common set of 27 ancient DNA libraries across a range of richness of DNA content and percentages of human molecules. All three reagents are highly effective at enriching many hundreds of thousands of SNPs. For all three reagents and a wide range of conditions, one round of enrichment produces data that is as useful as two rounds when tens of millions of sequences are read out as is typical for such experiments. In our testing, the “Twist Ancient DNA” reagent produces the highest coverages, greatest uniformity on targeted positions, and almost no bias toward enriching one allele more than another relative to shotgun sequencing. Allelic bias in 1240k enrichment has made it challenging to carry out joint analysis of these data with shotgun data, creating a situation where the ancient DNA community has been publishing two important bodies of data that cannot easily be co-analyzed by population genetic methods. To address this challenge, we introduce a subset of hundreds of thousands of SNPs for which 1240k data can be effectively co-analyzed with all other major data types.**

ancient DNA | human | sequencing | in-solution enrichment | SNP capture | minimizing bias

The strategy of using artificially synthesized oligonucleotides as baits to fish out complementary sequences in a DNA library has been transformative in ancient human DNA studies. Enrichment has involved diverse approaches including oligonucleotides of various lengths affixed to glass slides (1), or baits that are free in solution (“in solution enrichment”) (2). Under appropriate chemical and temperature conditions, these baits hybridize to targeted molecules so that other molecules can be washed away, allowing the bound molecules to be isolated, released, and then

49 sequenced. Enrichment has allowed researchers to achieve orders of magnitude enrichment for  
50 sequences that provide high information content to address important scientific questions.

51  
52 In medical genetics, the most common application of target enrichment has been capturing the  
53 approximately two percent of the genome that constitutes the coding sequences of genes (the  
54 “exome”). When whole genome sequencing at high coverage was still prohibitively expensive,  
55 exome sequencing dropped the cost for surveillance of the coding regions for mutations causing  
56 rare diseases to affordable levels (2, 3). In ancient DNA analysis, the benefits of target  
57 enrichment are even greater (4). Not only is a tiny fraction of the genome in practice relevant for  
58 the great majority of analyses, but typically only a small proportion of molecules in the DNA  
59 library come from the individual of interest due to microbial contamination. Occasional ancient  
60 DNA libraries do contain most of their molecules from the individual whose bone or tooth was  
61 sampled, but it is more typical for most of the analyzed molecules not to be of human origin. For  
62 example, of more than 3,000 ancient individuals for which our research group published  
63 genome-wide data by the end of calendar year 2021, about half had less than 10% percent human  
64 DNA. Whole genome sequencing of such samples is prohibitively expensive for all but the most  
65 important samples given the typical budgets accessible to ancient DNA laboratories.

66  
67 As an example of the challenge, consider a researcher who is interested in targeting a set of about  
68 600,000 SNP positions genotyped in diverse modern human populations. Only perhaps one in a  
69 hundred ancient DNA sequences mapping to the human genome will overlap these positions,  
70 given the typical lengths of ancient molecules. If a DNA library is only one percent human, the  
71 proportion of sequences that will be informative for analysis will only be about one in ten  
72 thousand. Thus, if ~400 million DNA sequences are read from a library which is a typical  
73 number used to produce a ~30-fold whole human genome from modern DNA, only ~40,000  
74 SNPs will be retrieved that overlap those genotyped in diverse modern populations. An  
75 individual with this much information will be only weakly informative for many analyses. In  
76 contrast, 25 million sequences from the same ancient DNA library after in-solution enrichment  
77 can provide coverage on nearly all targeted SNP positions by multiple unique molecules,  
78 allowing accurate inferences about population history at much lower cost.

79  
80 Practical in-solution enrichment for ancient human DNA libraries was pioneered between 2010-  
81 2013 in studies that enriched for mitochondrial DNA (5, 6), nearly all of the unique sequences of  
82 chromosome 21 (5) and all or part of the exome (1, 7). In 2015, several papers were published  
83 that enriched for sequences overlapping sets of SNPs. The reagent that has been most extensively  
84 used and that we evaluate here is the ‘1240k reagent’: it targeted slightly fewer than 1.24 million  
85 SNPs chosen to be particularly valuable for studying variation among modern human  
86 populations (8-10). It has proven highly effective, and has been used to generate more than 70%  
87 of all genome-wide ancient human dataset: over five thousand individuals published in more  
88 than seventy papers (compiled at <https://reich.hms.harvard.edu/allen-ancient-dna-resource-aadri-downloadable-genotypes-present-day-and-ancient-dna-data>). The large body of data produced  
89 using the 1240k reagent has also created an important legacy dataset whose existence needs to be  
90 taken to account by researchers contemplating shifting to a new method: any future enrichment  
91 data benefits by targeting the same set of sites which can then be co-analyzed with existing data.  
92 However, the 1240k reagent also has limitations including variability in effectiveness of  
93 enrichment of targeted SNPs, and bias toward capturing some alleles more than others at the  
94

95 same sites, leading to technical artifacts when such data are co-analyzed with other data types  
 96 such as random ‘shotgun’ sequencing data. Because of these technical challenges, researchers  
 97 often restrict analyses to 1240k data only, or to shotgun data only, excluding key datapoints  
 98 generated using the other strategy, and thus reducing the value of the world’s combined dataset.  
 99

100 **Table 1: Twenty-seven ancient DNA libraries experimentally characterized in this study**

| Library ID      | Library type | % human in shotgun sequencing | No. of 1,150,639 autosomal targets covered after downsampling to 25 million sequences |         |           | Ref. for earlier publication of data from same library |         |
|-----------------|--------------|-------------------------------|---------------------------------------------------------------------------------------|---------|-----------|--------------------------------------------------------|---------|
|                 |              |                               | 1240k                                                                                 | Arbor   | Twist     | Shotgun                                                | Capture |
| S20720.Y1.E1.L1 | DS           | 0.10%                         | 4,247                                                                                 | 3,129   | 4,383     | new                                                    | new     |
| S20721.Y1.E1.L1 | DS           | 1.18%                         | 38,513                                                                                | 29,958  | 43,375    | new                                                    | new     |
| S21299.Y1.E1.L1 | DS           | 2.04%                         | 332,624                                                                               | 227,616 | 379,349   | new                                                    | new     |
| S20703.Y1.E1.L1 | DS           | 6.57%                         | 648,971                                                                               | 483,408 | 823,496   | new                                                    | new     |
| S1633.E1.L1     | DS           | 86.68%                        | 812,084                                                                               | 647,823 | 1,042,602 | AGDP                                                   | (11)    |
| S8432.E1.L9     | SS           | 0.17%                         | 10,719                                                                                | 4,353   | 13,013    | new                                                    | new     |
| S2818.Y1.E4.L1  | SS           | 1.17%                         | 19,856                                                                                | 13,245  | 24,538    | new                                                    | new     |
| S13982.Y1.E8.L1 | SS           | 6.92%                         | 92,627                                                                                | 58,034  | 148,083   | new                                                    | (12)    |
| S10872.E1.L4    | SS           | 4.20%                         | 711,014                                                                               | 378,014 | 808,591   | new                                                    | (12)    |
| S10871.E1.L6    | SS           | 42.21%                        | 857,393                                                                               | 659,199 | 1,048,225 | new                                                    | (12)    |
| S2949.E1.L7     | DS           | 1.67%                         | 7,513                                                                                 | 2,476   | 8,624     | new                                                    | new     |
| S11857.E1.L1    | DS           | 7.46%                         | 26,697                                                                                | 9,726   | 32,107    | new                                                    | new     |
| S10871.E1.L1    | DS           | 52.59%                        | 857,393                                                                               | 659,199 | 1,048,225 | (13)                                                   | (13)    |
| S4532.E1.L1     | DS           | 69.12%                        | 803,925                                                                               | 652,927 | 1,083,523 | new                                                    | new     |
| S1734.E1.L1     | DS           | 73.92%                        | 808,314                                                                               | 676,065 | 1,076,264 | AGDP                                                   | (14)    |
| S4795.E1.L1     | DS           | 79.31%                        | 817,750                                                                               | 649,362 | 1,066,996 | AGDP                                                   | (15)    |
| S1507.E1.L1     | DS           | 66.59%                        | 816,665                                                                               | 683,200 | 1,077,678 | AGDP                                                   | (10)    |
| S1961.E1.L1     | DS           | 76.18%                        | 808,645                                                                               | 685,996 | 1,063,387 | new                                                    | new     |
| S2514.E1.L1     | DS           | 75.82%                        | 753,037                                                                               | 621,223 | 1,008,821 | new                                                    | new     |
| S1960.E1.L1     | DS           | 93.22%                        | 824,903                                                                               | 700,631 | 1,072,129 | new                                                    | new     |
| S1965.E1.L1     | DS           | 78.34%                        | 810,646                                                                               | 669,482 | 1,066,051 | new                                                    | new     |
| S2861.E1.L1     | DS           | 94.90%                        | 789,102                                                                               | 675,731 | 1,074,256 | AGDP                                                   | (11)    |
| S2520.E1.L1     | DS           | 87.29%                        | 763,183                                                                               | 646,338 | 1,022,068 | new                                                    | new     |
| S1583.E1.L1     | DS           | 68.66%                        | 789,976                                                                               | 645,082 | 1,042,853 | new                                                    | new     |
| S5950.E1.L1     | DS           | 69.63%                        | 793,523                                                                               | 678,635 | 1,076,585 | new                                                    | (12)    |
| S5319.E1.L1     | DS           | 95.54%                        | 806,669                                                                               | 679,549 | 1,074,390 | new                                                    | (12)    |
| S1496.E1.L1     | DS           | 85.45%                        | 809,418                                                                               | 683,539 | 1,072,954 | new                                                    | (12)    |

101 Note: We analyzed both double-stranded (DS) and single-stranded (SS) libraries. The first 10 lines are for single- and double-  
 102 stranded libraries of a range of complexities and percentages of human DNA for which we carried out a full characterization,  
 103 obtaining results for both 1 and in almost every case also 2 rounds of enrichment. The final 17 lines are for double-stranded libraries  
 104 that in general had very extensive shotgun sequencing data and for which we only performed the recommended number of rounds of  
 105 enrichment in the original protocol (2 for 1240k, 2 for Arbor Complete, and 1 for Twist Ancient DNA). The statistics in this table are  
 106 computed on a core set of 1,150,639 SNPs on chromosomes 1-22 targeted by all three reagents. The final columns indicate if data  
 107 from this library is first reported in this paper (“new”) or has previously been reported in a paper or in the Allen Genome Diversity  
 108 Project pre-publication data release (“AGDP”) (<https://reich.hms.harvard.edu/ancient-genome-diversity-project>).  
 109

110 A particular challenge with the 1240k reagent is that many ancient DNA laboratories have not  
 111 been able to effectively access the technology. Secondary distribution of the reagent was not  
 112 permitted by the company that synthesized the oligonucleotides. While the bait sequences were  
 113 fully published in 2015, resynthesis of the reagent was prohibitively expensive on a per-reaction  
 114 basis for laboratories interested in using the reagent on a scale of fewer than hundreds of

115 samples. To make it possible for any ancient DNA researcher to carry out in-solution enrichment  
116 of more than a million SNPs, in 2021 two companies, Daicel Arbor and Twist Biosciences, made  
117 available in-solution enrichment reagents that target the core panel of 1.24 million SNPs as well  
118 as additional SNPs meant to address perceived gaps in the coverage of the original reagent. The  
119 co-authors of this study advised on the creation of these reagents, but were not paid as  
120 consultants and will not receive any remuneration from sale of the reagents. Here we describe a  
121 systematic comparison of all three reagents on a common set of 27 ancient DNA libraries chosen  
122 to span a range of library qualities from low to high percentages of human DNA, and from low  
123 to high complexities with respect to the number of unique human molecules present in the  
124 libraries (Table 1). In the interests of providing an independent assessment, our manuscript has  
125 not been reviewed by the companies that generated the reagents.

126

## 127 **Results**

128

129 **Design of the three reagents.** For completeness we begin by summarizing the original ‘1240k’  
130 design, first reported in 2015 (8). The almost 1.24 million probes (1,233,013 after filtering to  
131 sites that could be robustly analyzed) were published in the supplementary materials of that  
132 study. Each SNP was targeted by four probes of 52 bp. To reduce bias toward capturing one  
133 allele or the other, two probes abutted but did not overlap the SNP in either direction. Another  
134 two probes were centered on the SNP, each with an alternative allele (again to reduce bias). The  
135 probes were appended on one side by an 8 bp universal flanking sequence and the 60 bp  
136 oligonucleotides were printed on Agilent 1M custom arrays. The baits were then biotinylated (5).

137

138 The SNP targets in the 1240k reagent were chosen to achieve a variety of purposes, summarized  
139 in Table 2 and the original publications (8-10). They included all the designable content of the  
140 Affymetrix Human Origins genotyping array (16) that has now been used to publish data on  
141 >8,800 present-day people from >840 human populations around the world (more than 90% of  
142 these data were published in thirteen studies (11, 16-28)). They included all the designable  
143 content of the Illumina 650Y genotyping array, part of a family of similar Illumina arrays whose  
144 content was iteratively optimized for genome-wide association studies and which have been  
145 widely used in genome-wide studies of human history. The 1240k targets furthermore included  
146 SNPs on the Affymetrix GeneChip Human Mapping 50K Xba Array; SNPs on the X  
147 chromosome to enable comparative studies of male and female population history; and SNPs on  
148 the Y chromosome to determine haplotypes. Finally, they included SNPs of phenotypic interest  
149 from association studies, scans of selection, or particularly important loci such as the HLA  
150 region of chromosome 6. In practice, 1240k reagent SNP enrichment experiments have also  
151 often include spiked-in oligonucleotide baits allowing enrichment of mitochondrial DNA (5, 6).

152

153 For the Daicel Arbor “myBaits Expert Human Affinities” reagent, the oligonucleotide bait  
154 design is proprietary and the authors of this study do not have access to the technical details.  
155 Several modules are available ([https://arborbiosci.com/genomics/targeted-  
156 sequencing/mybaits/mybaits-expert/mybaits-expert-human-affinities/](https://arborbiosci.com/genomics/targeted-sequencing/mybaits/mybaits-expert/mybaits-expert-human-affinities/)). “Prime Plus” targets the  
157 exact same set of SNPs as the 1240k reagent along with the mitochondrial genome and a  
158 supplementary set of 46,218 Y chromosome SNPs. The “Complete” product adds an additional  
159 852,068 transversion polymorphisms (“Ancestral Plus”) discovered as variable among archaic  
160 humans and validated as polymorphic in present-day humans (<https://arborbiosci.com/wp->

161 [content/uploads/2021/03/Skoglund\\_Ancestral\\_850K\\_Panel\\_Design.pdf](#)). These sites were  
162 chosen with the goal of facilitating analyses of African human population history, where biases  
163 due to the ancestry of the individuals in whom SNPs are discovered has the potential to  
164 complicate inferences (29). The fact that these SNPs are transversions is also useful when  
165 enriching ancient DNA libraries not enzymatically treated to remove ancient DNA damage  
166 which causes high error rates at transition SNPs. All the Arbor reagents also include baits to  
167 enrich mitochondrial DNA. We characterized the “Arbor Complete” reagent, which after  
168 accounting for the intersections of various SNP panels constitutes 2,131,299 SNPs.

169  
170 For the Twist Biosciences “Twist Ancient DNA” reagent, a single 80 bp probe was centered on  
171 each targeted SNP. To avoid bias toward one allele or another, the nucleotide at the position of  
172 the SNP was chosen to be different from the two SNP alleles. The reagent was built around a  
173 core of 1,200,343 1240k SNPs (all 1240k SNPs on chromosomes 1-22 and X). It replaced the  
174 32,670 1240k chromosome Y SNPs with 81,925 chosen to provide improved haplogroup  
175 resolution. It also added 94,586 additional phenotypically relevant targets chosen to target SNPs  
176 that were significant in genome-wide association studies in large sample sizes (32), as likely to  
177 have been affected by natural selection (33), as possibly implicated in rare disease (34), or as  
178 useful for computing heritability of complex traits (35) (Supplementary Section 1). These SNPs  
179 were only added to the reagent if they were not in high linkage disequilibrium with the core  
180 1240k set (Supplementary Section 1, Online Table 1). The Twist reagent also targeted non-SNP  
181 locations. It tiled 857,339 bp in 3,171 Human Accelerated Regions (HARS); 2,577 bp in 3 genes  
182 relevant to  $\alpha$ -thalassemia,  $\beta$ -thalassemia, and favism; and 40,000 CpG dinucleotides where  
183 methylation rates are known to be correlated to human age (Supplementary Section 2). After  
184 filtering to probes that designed well, the final reagent included 1,434,155 probes targeting  
185 1,352,535 SNPs. A mitochondrial panel from Twist Biosciences can be added to the bait pool; in  
186 practice we did not spike in sufficient concentrations of the mitochondrial DNA reagent to  
187 achieve consistently high mitochondrial DNA coverage, but subsequent experiments with more  
188 baits achieved results comparable to the other methods (data not shown).

189  
190 **Empirical characterization of the three reagents.** We experimentally characterized reagent  
191 performance in 27 libraries on which we performed 109 enrichment experiments (Table 1). All  
192 our sequencing was performed on HiSeqX10 instruments, and we report data on 12.2 billion  
193 merged sequences obtained for the enrichment experiments, and 43.3 billion merged sequences  
194 from shotgun sequencing. Basic statistics on the sequencing results for these libraries both before  
195 enrichment (shotgun sequencing), and after enrichment, are reported in Supplementary Table 1.

196  
197 (i) For 10 libraries of a range of complexities and percentages of endogenous human DNA (5  
198 double-stranded and 5 single-stranded), we produced 0.006-26.7 mean coverage on the  
199 1240k autosomal targets (assessed from 2 rounds of 1240k capture after removing duplicated  
200 molecules), and ranging in percentage of human DNA from 0.1% - 87%. We carried out 58 =  
201 10 x 6 - 2 enrichment experiments on these libraries (the two most complex libraries were not  
202 captured for 2 rounds for Twist Ancient DNA). We carried out enrichment using all three  
203 reagents with the settings specified in the Methods, and deeply sequenced capture products  
204 both after the first and second round of sequencing, with 25-395 million merged sequences  
205 (median 95 million merged reads) for each experiment (Supplementary Table 1).

206

207 (ii) For 17 double-stranded libraries 15 of which were of high complexity and high percentage of  
 208 human DNA, we carried out extensive shogun sequencing, in 14 cases to more than 20-fold  
 209 coverage. The shotgun data for four libraries has been fully published (12, 13, 36, 37), and  
 210 the shotgun data for an additional 8 libraries has been released pre-publication as part of the  
 211 Allen Ancient Genome Diversity Project / John Templeton Ancient DNA Atlas  
 212 (<https://reich.hms.harvard.edu/ancient-genome-diversity-project>) (Table 1). We carried out  
 213 51=17x3 enrichments on these libraries with the experimental settings specified in the  
 214 recommended protocols. Thus, we sequenced after two rounds of capture for 1240k and  
 215 Arbor Complete, and one round of capture for Twist Ancient DNA. We sequenced the  
 216 enriched products far more deeply than the ~25 million sequences typically generated for  
 217 such experiments (median of 104 million merged sequences, Supplementary Table 1).  
 218

219 **Variation in effectiveness of enrichment in different parts of the genome.** Table 2 highlights  
 220 different targeted subsets of the genome, and shows the mean coverage in each category relative  
 221 to the average achieved at the core set of 1,150,639 autosomal SNP positions (to assess coverage  
 222 we use number of sequences obtained prior to removal of PCR duplicates as our goal here is to  
 223 study the relative effectiveness of enrichment). In Online Table 1, we provide a SNP-by-SNP  
 224 breakdown (this table also reports meta-information including why each SNP was targeted).  
 225 Online Table 2 assesses the methylation targets (40,000 CpG dinucleotides). Online Table 3  
 226 covers Human Accelerated Regions (3,171 regions). Online Table 4 covers resequencing targets  
 227 (in 3 regions). Online Table 5 reports 10.4 million alignable nucleotides on the Y chromosome.  
 228 Online Table 6 reports results for 15,569 nucleotides of mitochondrial DNA.  
 229

230 **Table 2: Effectiveness of enrichment in different targeted subsets of the genome**

| Targeted subset of the genome<br>(some categories overlap) | # positions<br>(either SNPs or tiled<br>nucleotides) | 1240k<br>coverage<br>(vs. core set) | Twist<br>coverage<br>(vs. core set) | Arbor<br>coverage<br>(vs. core set) |
|------------------------------------------------------------|------------------------------------------------------|-------------------------------------|-------------------------------------|-------------------------------------|
| <b>SNPs</b>                                                |                                                      |                                     |                                     |                                     |
| Affymetrix Human Origins                                   | 597,573                                              | 1.003                               | 1.127                               | 1.086                               |
| Illumina 650Y                                              | 660,611                                              | 0.951                               | 0.882                               | 0.927                               |
| Affymetrix 50K                                             | 58,559                                               | 0.371                               | 0.516                               | 0.71                                |
| 1240k phenotypic supplement                                | 45,969                                               | 0.988                               | 0.929                               | 0.936                               |
| 1240k X content                                            | 49,704                                               | 1                                   | 1                                   | 1                                   |
| 1240k Y content                                            | 32,670                                               | 1                                   | 1                                   | 1                                   |
| Twist phenotypic supplement                                | 94,587                                               | 0.059                               | 0.943                               | 0.136                               |
| Twist Y content                                            | 81,925                                               | 0.475                               | 1.016                               | 0.813                               |
| Arbor ancestral supp.                                      | 852,068                                              | 0.136                               | 0.147                               | 0.586                               |
| Arbor Y supplement                                         | 46,218                                               | 0.184                               | 0.952                               | 0.774                               |
| <b>Tiling nucleotides</b>                                  |                                                      |                                     |                                     |                                     |
| Mitochondrial DNA                                          | 16,569                                               | 6.17                                | 2.955                               | 28.51                               |
| Twist HAR supplement                                       | 857,339 (3171 HARs)                                  | 0.039                               | 2.448                               | 0.09                                |
| Twist gene sequencing supplement                           | 2,577 (in three genes)                               | 0.54                                | 3.206                               | 0.088                               |
| Twist methylation targets                                  | 80,000 (40,000 CpGs)                                 | 0.086                               | 3.584                               | 0.109                               |

231 Note: Relative coverage is computed by taking the average in this part of the genome after pooling data from all 27  
 232 libraries (2 rounds for 1240k, 2 rounds for Arbor, and 1 round for Twist), and dividing by either 1,150,639 SNPs on  
 233 chromosomes 1-22, 49,704 SNPs on chromosome X (for SNPs there), or 32,670 SNPs for chromosome Y (for SNPs  
 234 there). Coverage computations are based on sequence counts prior to removing PCR duplicated sequences.  
 235

236 All three methods not only enrich for the targeted content, but also for other positions usually  
 237 within dozens of nucleotides on either side of explicitly targeted content (Figure 1). To obtain a  
 238 better understanding of the patterns of enrichment near targeted locations and to assess if they  
 239 can be useful, we annotated all 81.2 SNPs in the 1000 Genomes project dataset (38) by the  
 240 coverage relative to the 1240k autosomal SNP targets (Online Table 7). All reagents effectively  
 241 enriched not just the target SNPs, but hundreds of thousands of polymorphic positions nearby;  
 242 for example, we identified ~130,000-170,000 SNPs that were enriched to  $\geq 50\%$  of the autosome-  
 243 wide average coverage and had a minor allele frequency  $\geq 5\%$  in at least one 1000 Genomes  
 244 Project continental population (Table 3). Researchers wishing to choose such non-targeted SNPs  
 245 for inclusion in their analyses can select them based on the metrics in Online Table 7.

246 **Figure 1: Distribution of sequence coverage as a function of distance from targets.**

247 Results are for the 15 high coverage sequencing libraries prior to removal of PCR duplicates, normalized by average coverage at  
 248 targeted SNPs (position 0). Compared to nucleotides 100 base pairs from the closest target, coverage is 74-fold, 40-fold, and 15-  
 249 fold enriched 1240k, Twist, and Arbor. Enrichment falls to 50% of targeted SNPs between 34-37 bases from SNP targets.

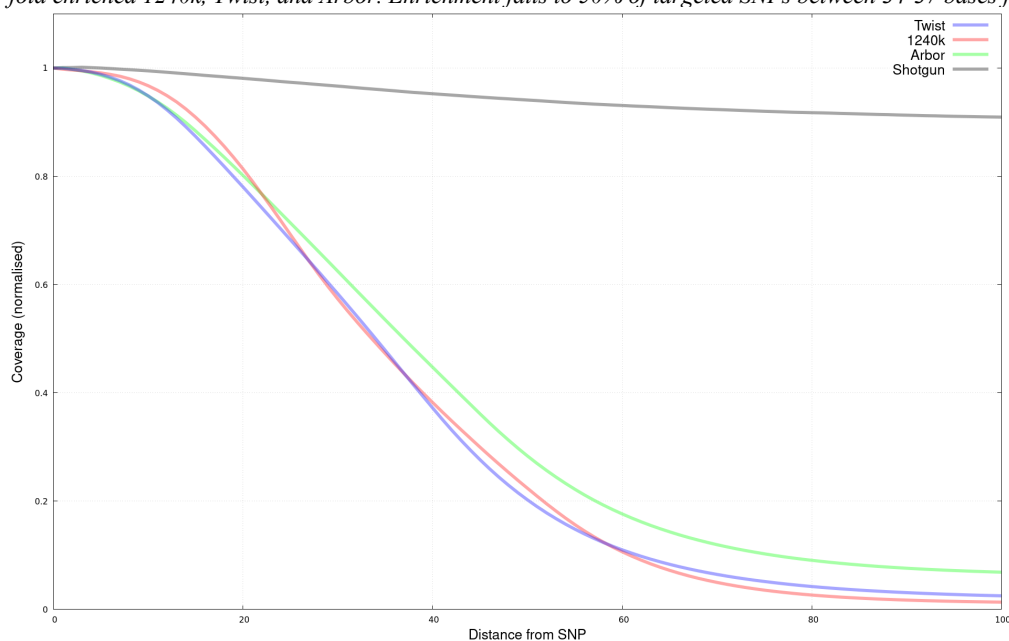

250 **Table 3: Enrichment of hundreds of thousands of near-target SNPs.**

| Reagent<br>(no. of targeted SNPs) | Maximum minor<br>allele frequency | Coverage $\geq 10\%$ of the average at<br>core set of 1,150,639 SNPs | Coverage $\geq 50\%$ of the average<br>at core set of 1,150,639 SNPs |
|-----------------------------------|-----------------------------------|----------------------------------------------------------------------|----------------------------------------------------------------------|
| 1240k<br>(1,233,013)              | $\geq 1\%$                        | 474,617                                                              | 265,743                                                              |
|                                   | $\geq 5\%$                        | 236,478                                                              | 130,478                                                              |
| Arbor Complete<br>(2,131,299)     | $\geq 1\%$                        | 759,543                                                              | 270,247                                                              |
|                                   | $\geq 5\%$                        | 375,620                                                              | 130,811                                                              |
| Twist Ancient DNA<br>(1,322,529)  | $\geq 1\%$                        | 661,221                                                              | 361,077                                                              |
|                                   | $\geq 5\%$                        | 330,066                                                              | 172,835                                                              |

Note: This analysis restricts to SNPs within 50bp of explicitly targeted nucleotides.

251 **Enrichment is less biased for Twist Ancient DNA than for other methods.** We built  
 252 histograms of coverage on targeted SNPs pooling over the libraries for which we had deep  
 253 sequencing data (Figure 2A,B). The histograms are centrally peaked for shotgun sequencing

254 (1% of SNPs with coverage <0.1-fold of the mean) and for Twist Ancient DNA (5% of SNPs),  
 255 as expected for more homogeneous enrichment. In contrast, we observe skewed enrichment for  
 256 1240k (28% of SNPs with coverage <0.1-fold of the mean) and Arbor Complete (16% of SNPs).  
 257

258 Further evidence for a relatively homogeneous enrichment for Twist Ancient DNA comes from  
 259 the proportion of guanines and cytosines in sequenced molecules, which is similar for Twist data  
 260 and shotgun data, whereas Arbor Complete data shows a downward bias and 1240k an upward  
 261 bias (Figure 1C). The Twist Ancient DNA also shows less of a bias toward an increase in the  
 262 length of molecules than the other two enrichment methods (Figure 2D).  
 263

264 **Figure 2: Biases in enrichment.**

265 We restrict to the 1,150,639 autosomal SNPs targeted by all three reagents. The top two panels analyze 15 libraries with high  
 266 coverage shotgun sequencing data; the bottom two analyze 10 libraries with full results from both rounds of capture. (A)  
 267 Variation in coverage across targeted SNPs is shown as a smoothed histogram where we normalize the y-axis by the maximum  
 268 rate in bins with >0.025 of the average coverage. (B) The fraction of sites with coverage below different multiples of the mean.  
 269 (C) The proportion of nucleotides that are either guanine or cytosine (GC) has a downward bias relative to the unenriched library  
 270 for Arbor, an upward bias for 1240k, and little bias for Twist Ancient DNA. (D) All reagents preferentially enrich for longer  
 271 molecules, with the least length effect for Twist Ancient DNA (medians for each data type are show in the legend).

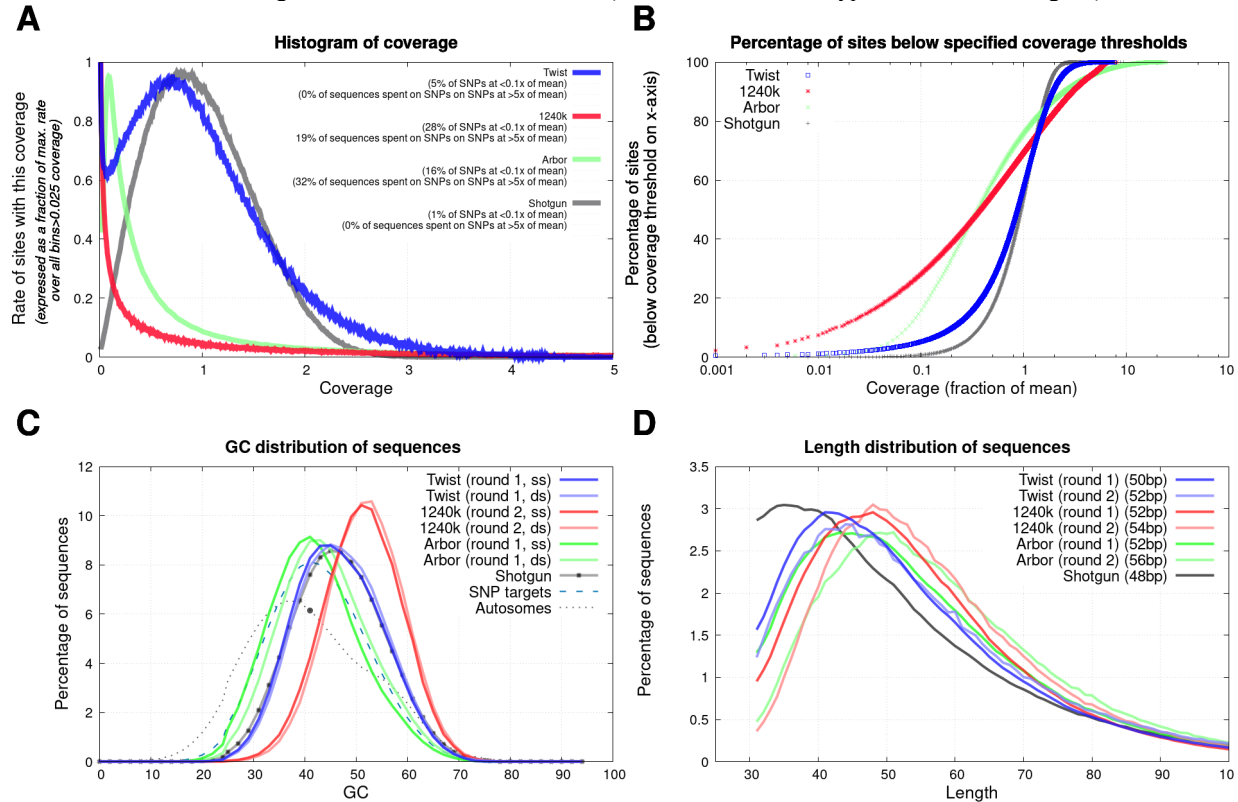

272 **All reagents are effective with Twist Ancient DNA consistently achieving highest coverage.**  
 273 As expected from its greater homogeneity in enrichment, Twist Ancient DNA achieves  
 274 consistently high genome-wide coverage when measured by the number of SNPs hits at least  
 275 once, for an amount of sequencing (25 million read pairs) that is typical for such experiments  
 276 (Table 1). Compared to 1240k data the average increase in targeted SNP count is 1.21-fold, and  
 277 compared to Arbor Complete it is 1.46-fold. We observe similar patterns for a range of  
 278 sequencing coverages (Figure 3 and Supplementary Figure 1).



279  
280  
281

**Figure 3: Performance of the three reagents over a range of sequencing depths.**

This analysis is based on various amounts of downsampling relative to the full sequencing data.

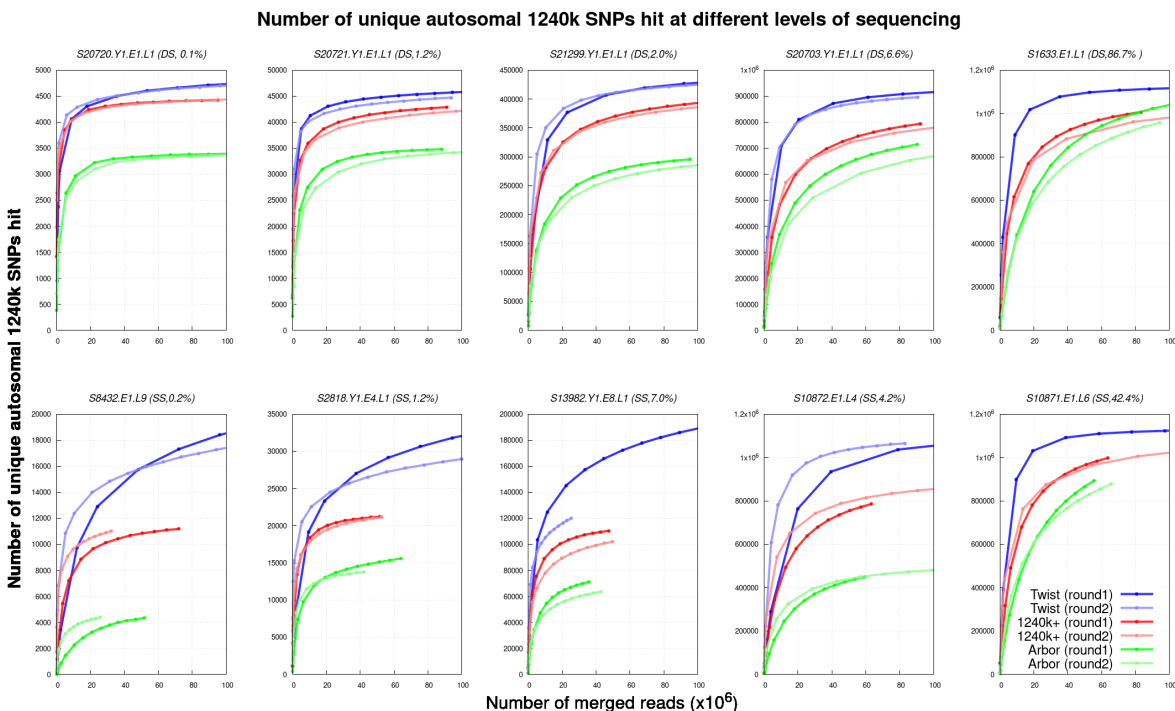

282

283 The increased yield for Twist Ancient DNA relative to the other protocols is particularly  
284 apparent for low complexity and single-stranded libraries, the condition for which we optimized  
285 this reagent over multiple rounds of testing. However, the Twist Ancient DNA reagent also  
286 outperforms the 1240k reagent for low-complexity double stranded libraries for which that  
287 methodology was optimized, highlighting how the Twist reagent is a definitively better reagent  
288 than 1240k from a technical point of view. For the Arbor Complete experimental settings we  
289 performed no optimization; instead, we used the manufacturer's recommended protocol before  
290 product launch which differs from the one now available in the online manual. Better enrichment  
291 performance (perhaps much better) could likely be achieved with the Arbor Complete reagent  
292 through multiple rounds of optimization such as we performed for Twist Ancient DNA and  
293 1240k. The correct lesson to take from these results is that the Arbor Complete reagent is  
294 effective and that these results place a minimum not a maximum on its utility.

295

296 A remarkable feature of all three enrichment method is the similar genome-wide coverage  
297 obtained from one round and two rounds of sequencing when a typical amount of data is  
298 collected after enrichment (~25 million sequences). This is striking in light of the fact that the  
299 proportion of sequences overlapping targets being much higher after two than one rounds of  
300 enrichment (average of 10-fold, median of 4-fold higher for the experiments in Figure 3)  
301 (Supplementary Table 1). The explanation is that the number of molecules typically sequenced  
302 after enrichment (~25 million), is far larger than the number of targeted positions. Thus, even  
303 with the relatively small proportions of molecules hitting targets after one round of enrichment,  
304 we in practice obtain sequences that cover the great majority of the targeted positions in the  
305 library. Because each enrichment round increases bias relative to the unenriched library, and  
306 because one round of enrichment is less expensive and time consuming than two, we recommend

307 that standard practice for all three reagents should be to carry out just one round of enrichment  
308 (thus, the second round of enrichment for nearly all 1240k experiments to date was unnecessary).

309  
310 A potential concern related to our approach of comparing results only at the 1,150,639 autosomal  
311 SNPs common to all three reagents is that this could be unfair to reagents that target more SNPs  
312 (especially Arbor Complete and to a lesser extent Twist Ancient DNA). In practice this is not a  
313 serious concern, as for a single round of enrichment which is our final recommended setting for  
314 all three reagents, the great majority of sequenced molecules miss targets (Supplementary Table  
315 1), and thus the rate of molecules hitting targeted positions outside the 1,150,639 evaluation SNP  
316 set is small relative to the off-target content. In this setting, enrichment efficiency as assessed by  
317 the ratio of sequences overlapping the core set of SNP targets (the 1,150,639) to fully untargeted  
318 positions is similar to the same quantity if we do not drop sequences overlapping other targets.  
319 We use the number of merged sequences on the x-axis of Figure 3 instead of a corrected number,  
320 as number of merged sequences is intuitively understandable and relevant to real experiments.

321  
322 **Addressing concerns about technical bias due to co-analysis of data from different sources.**

323 Biases associated with alignment and enrichment can affect population genetic analysis, causing  
324 data from two ancient DNA libraries processed using the same enrichment protocol to appear to  
325 have genetic affinities to each other even though the truth is that individuals from whom the  
326 libraries were obtained do not have distinctive relatedness. Concerns of this type have meant that  
327 in practice for population genetic analyses, researchers have often restricted their analyses to in-  
328 solution enrichment data using the 1240k reagent, or shotgun data, creating a challenging  
329 situation where two disjoint datasets have been built up in the community that are difficult to co-  
330 analyze. Even if a technology is more accessible to the community, and even if it is more  
331 efficient at capturing all targeted positions than the existing 1240k enrichment reagent, its  
332 practical value could be limited if it was difficult to co-analyze with data from other methods.

333  
334 **Figure 4: Principal Component Analysis shows similar ancestry regardless of data source.**

335 We performed PCA on >1000 West Eurasians, and projected data from the 15 individuals in the last rows of Table 1.

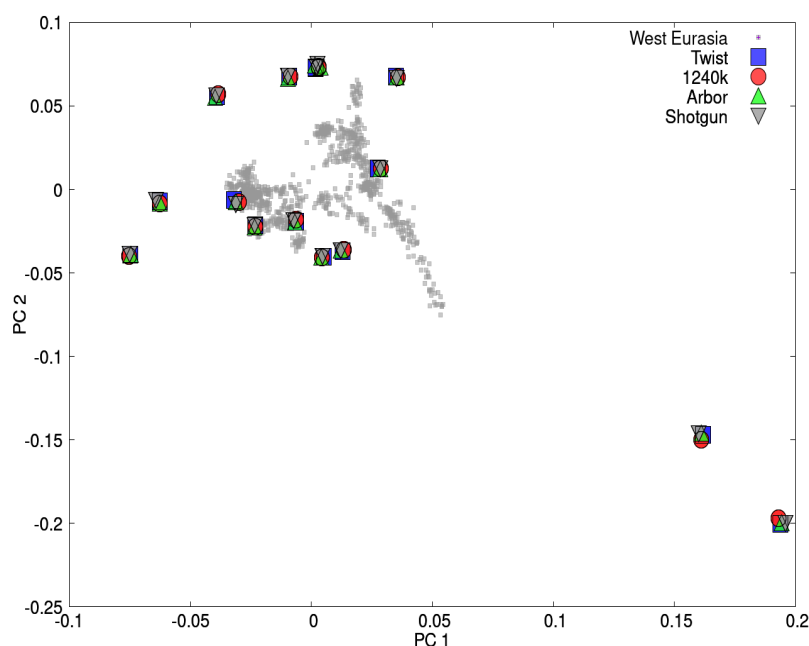

336 To explore how bias might affect our results, we began by projecting the data from the 15  
 337 libraries at the bottom of Table 1 onto a Principal Component Analysis of data from diverse  
 338 present-day West Eurasian people living today (Figure 4). Encouragingly, all data from the same  
 339 individuals plots at the same position, consistent with the pattern observed in the first publication  
 340 of Twist Ancient DNA data where Neolithic individuals from Hazleton North in southern Britain  
 341 clustered tightly whether the data source was 1240k or Twist (39). That study also showed that  
 342 Twist and 1240k data could be robustly co-analyzed to detect familial relatedness (39).

343  
 344 Lack of evidence for bias in PCA does not mean concerns about bias should be set aside. To  
 345 further probe for bias associated with the different data generation technologies, for each of the  
 346 15 high coverage libraries we identified all SNP positions that were likely to be heterozygous  
 347 based on observing at least one sequence matching both the reference allele and at least one  
 348 matching the variant allele. For each SNP, we counted all reference and variant alleles observed  
 349 at likely heterozygous positions beyond those not used in ascertainment; if there are no biases we  
 350 expect 50% of these sequences to match the reference variant. We implemented an Expectation  
 351 Maximization algorithm that uses these counts to estimate the distribution of reference bias for  
 352 all SNPs, correcting for limited sample size which will produce more apparent variation in  
 353 reference bias than is in fact the case (Supplementary Section 2).

354  
 355 **Figure 5: Allelic bias due to the different enrichment strategies.**  
 356 (A) Mean and standard deviation in the rate of matching to the reference genome for different data types, stratifying by sequence  
 357 length, and correcting for stochastic error in the estimates using an Expectation Maximization (EM) algorithm described in  
 358 Supplementary Section 2. (B) Distribution across SNPs in degree of reference bias. All analyses are based on sequences from loci  
 359 ascertained as highly likely to be heterozygous, corrected for stochastic sampling variance using the EM.

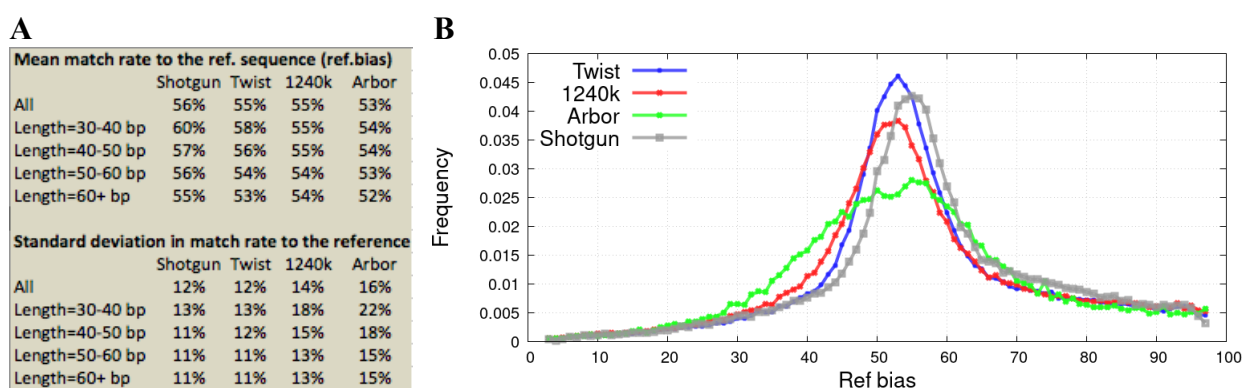

360 We observe substantial average reference bias for all methods, which as expected due to the  
 361 difficulty of mapping is word for shorter reads (Figure 5). A substantial degree of average  
 362 reference bias is an important problem—and methods have been developed for mapping ancient  
 363 DNA sequences in a way that reduces reference bias by an order of magnitude (40, 41)—but it is  
 364 not the focus of this study, especially as reference bias also affects unenriched shotgun data. The  
 365 unique issue for enrichment is the wider variation in reference bias across SNPs for 1240k and  
 366 especially for Arbor Complete than for either shotgun or Twist Ancient DNA, even after  
 367 controlling for sequence length (Figure 5). This reflects the fact 1240k and Arbor Complete,  
 368 while not more likely to capture the reference allele on average, are more likely to skew from the  
 369 mean degree of reference bias. Such skews specific to a technology are expected to cause data  
 370 generated from two libraries processed by the same technology to have artifactual affinity.

371

372  
 373 To detect these artifactual attractions, we computed symmetry statistics of the form  $f_4$ (library 1 -  
 374 reagent A, library 1 - reagent B; library 2 - reagent A, library 2 - reagent B). If there are no  
 375 technical biases, this quantity is expected to be 0, as data from each library should be  
 376 symmetrically related to that from all other libraries. In contrast, if there are technical biases, we  
 377 expect positive values of the statistic reflecting greater-than-random co-occurrences of alleles  
 378 from two libraries processed using the same technology. Figure 6A computes a Z-score for the  
 379 deviation of these  $f_4$ -statistics from zero based on a Block Jackknife standard error; for the one-  
 380 sided test appropriate here,  $Z > 1.7$  corresponds to  $P < 0.05$ , and  $Z > 3.1$  corresponds to  $P < 0.0001$   
 381 (16). We observe that the Z-scores trend positive for all pairwise comparisons of the 15 libraries,  
 382 as expected from the fact that any technical bias will cause a positive deviation. The statistics are  
 383 most positive (mean Z of 3-4) for comparisons involving Arbor Complete captured SNPs,  
 384 suggesting the strongest technical bias for this data type and consistent with the evidence that  
 385 Arbor data has the largest standard deviation in reference bias across SNPs as shown in Figure  
 386 5A. The statistics are also large (mean Z almost 2) for statistics comparing 1240k to Twist  
 387 Ancient DNA or shotgun data, as expected from the empirical observation of problems of co-  
 388 analyzability of these two data types. Bias is minimal for Twist Ancient DNA comparisons to  
 389 shotgun data (mean Z-score of around 0.6 with almost all Z-scores between -2 and 2) consistent  
 390 with these two data types being far more co-analyzable from a population genetic perspective.  
 391

392 **Figure 6: Artifactual attraction of data produced used the same methodology.**

393 (A) We compute symmetry statistics of the form  $f_4$ (library 1 - reagent A, library 1 - reagent B; library 2 -  
 394 reagent A, library 2 - reagent B), and plot Z-scores for all  $105 = 15 * 14 / 2$  pairwise comparisons of the 15 high coverage libraries as well as box-and-  
 395 whisker plots showing full range, 25th and 75th percentiles, and mean. Statistics involving Arbor Complete are indicated with a  
 396 green box; remaining comparisons involving 1240k with a red box; and the Twist Ancient DNA - shotgun comparison in blue.  
 397 (B) Same analysis but restricted to a subset of 42% of autosomal SNPs chosen to have very similar rates of matching to the  
 398 reference allele for shotgun and 1240k reagent data (empirically within 4% of each other).

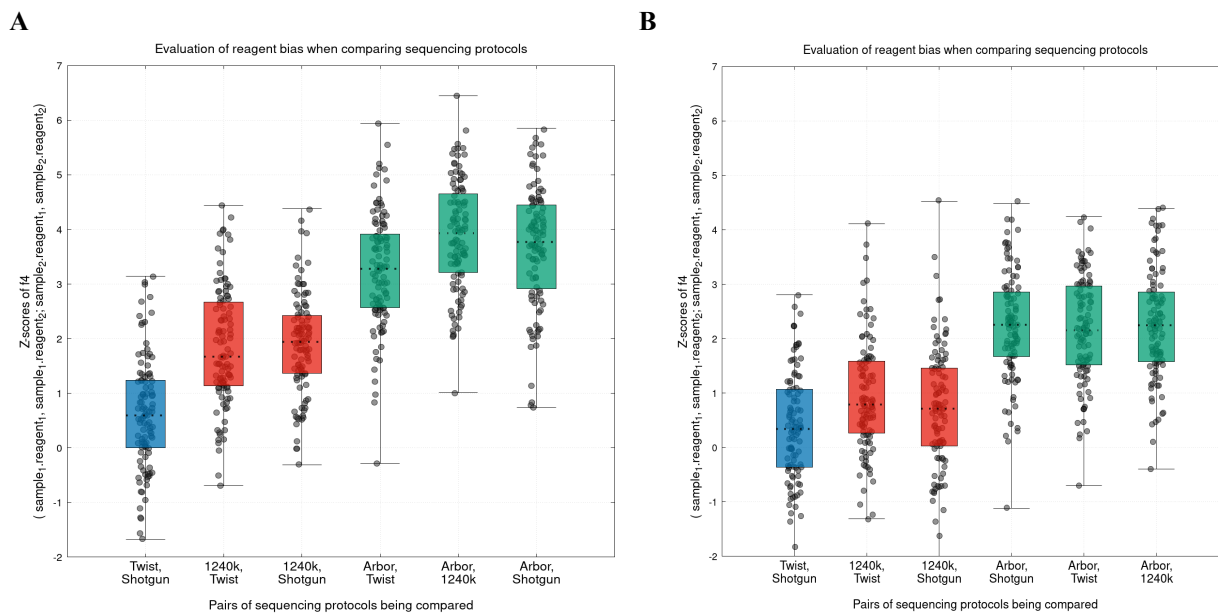

399 While the minimal allelic bias associated with the data produced by the Twist Ancient DNA  
 400 reagent and its easy co-analyzability with shotgun data addresses a limitation of the vast majority  
 401 of capture experiments to date, it raises a new concern about co-analyzability of Twist Ancient

402 DNA data with 1240k data. We therefore set out to identify a subset of SNPs with less  
403 susceptibility to such bias. To do this we mine data from 488 libraries for which we had shotgun  
404 data at a median of 5-fold coverage and also good 1240k data (much of this dataset is available  
405 as a pre-publication data release at [https://reich.hms.harvard.edu/ancient-genome-diversity-  
406 project](https://reich.hms.harvard.edu/ancient-genome-diversity-project)). We used imputation with GLIMPSE (42) to infer diploid genotypes at each SNP  
407 location (43) and counted rates of sequences matching to the reference and variant allele in all  
408 individuals where the posterior probability of being heterozygous was  $>0.9$  at a given SNP. If  
409 there are no biases in enrichment, the frequency of observing the reference allele in the 1240k  
410 enrichment data is expected to match that in the shotgun sequence data (both 0.5). We restricted  
411 to the 42% of autosomal SNPs where difference in rate rates of matching to the reference allele  
412 for shotgun data and 1240k data was empirically less than 4% in the pooled reads over 488  
413 libraries (this set of SNPs is specified as a column in Online Table 1). Figure 6B shows that the  
414 mean Z-scores for all  $f_4$ -symmetry statistics comparing libraries that are shotgun sequenced,  
415 libraries enriched using 1240k, and libraries enriched using the Twist Ancient DNA reagent are  
416 between 0 and 1 after restricting to this set of SNPs, suggesting that this approach reduces biases.

417  
418 Our goal in this analysis has been to demonstrate that a practical filter to reduce technical bias  
419 between methods exists; we have not attempted to optimize the filter and believe that there is  
420 substantial room to make the filter even better. The demonstration of the filter is also important  
421 for a reason that has nothing to do with Twist data, as it suggests a solution to problem that has  
422 been a long-standing challenge for ancient human DNA studies, namely, the difficulty of co-  
423 analyzing shotgun and 1240k enrichment data in genetic studies of population history. Applying  
424 a filter like has the potential to make data from diverse sources—1240k and shotgun and Twist—  
425 co-analyzable even for sensitive population genetic analyses.

426

## 427 **Discussion**

428

429 We have systematically compared three in-solution reagents for enriching ancient DNA libraries  
430 for more than a million SNPs, and found that all three are highly effective.

431

432 The 1240k reagent has a proven track record, and has been used in more than 70 publications to  
433 report data from more than 5000 ancient individuals and to make robust inferences about  
434 population history. While 1240k data shows more allelic bias and less target homogeneity than  
435 Twist Ancient DNA data, for studies of population history, the most important requirement is to  
436 regularly retrieve data from a large number of SNPs and it does this well.

437

438 The Arbor Complete reagent has several highly attractive features: it targets the same core set of  
439 SNPs as the 1240k enrichment reagent so that data can be co-analyzed, it targets an additional  
440  $\sim 850,000$  transversion SNPs chosen to be useful for studies of African population genetics, and it  
441 can be purchased commercially. Our implementation of Arbor Complete enrichment did not  
442 produce as high-quality results as the two other methods, but we also did not optimize the Arbor  
443 protocols in our lab as we did for the 1240k reagent and the Twist Ancient DNA reagent, and  
444 there is thus great potential for further performance improvement for this reagent.

445

446 The Twist Ancient DNA reagent was the most efficient of the three in our experiments, capturing  
447 sequences overlapping almost all targeted positions with relatively high homogeneity, achieving

448 higher coverage, and having the least allelic bias making it most easily co-analyzable with  
449 shotgun data at nearly all analyzed SNPs. Like Arbor Complete, the Twist Ancient DNA reagent  
450 is commercially available. We have introduced a filter that makes it possible to tag SNPs most  
451 affected by the bias in 1240k enrichment, and which provides confidence that Twist data will be  
452 robustly co-analyzable with the great majority of ancient human DNA data generated to date.

453

454 Because of the multiple advantages associated with the Twist Ancient DNA reagent relative to  
455 1240k in our testing, in June 2021 we performed our last of more than 28,500 1240k captures in  
456 our laboratory. Since then, we have performed more than 4,500 captures with Twist Ancient  
457 DNA reagent, and have already published our first data with this reagent (39). It is important for  
458 scientific communities periodically to update their methodologies when there are enough  
459 technical improvements, and we believe the advantages of new reagents are now so large that  
460 this time has come for ancient human DNA.

## 461 **Materials and Methods**

462

463 **DNA extraction and library preparation.** We extracted DNA from tooth or bone powder with  
464 a manual (44, 45) or automated protocol (46) using Dabney buffer and silica coated magnetic  
465 beads. We built the extract into indexed single-stranded USER-treated libraries (47) or into  
466 partial-UDG-treated barcoded double-stranded libraries (48). For cleanups after automated  
467 library preparation, we used silica coated magnetic beads and PB (Qiagen), and for cleanups  
468 after amplification we used SPRI.

469

470 **Target enrichment.** The three target enrichment reagents all consist of biotinylated DNA  
471 probes, and while Arbor Complete and 1240k use single-stranded probes (52 bp for 1240k,  
472 unknown to us for Arbor Complete), Twist Ancient DNA uses double-stranded 80 bp probes.  
473 The original protocol for Twist reagents specified one round of enrichment, whereas the original  
474 protocols for Arbor Complete and 1240k specified two consecutive rounds of enrichment. Arbor  
475 Complete and 1240k had the mitochondrial panel included in our testing (1240k reagent: 3 bp  
476 tiled probes of mitochondrial genome of 52 bp length, spiked in at 0.033%), whereas for Twist  
477 Ancient DNA we only added the Twist Mitochondrial Panel to 19 of the 27 libraries (120 bp  
478 long probes, spiked in at 1.67%). In our Twist testing, we added in the mitochondrial DNA  
479 probes at a tenth of the concentration we had intended (our plan had been to spike in at 16.7%  
480 but effectively we used 10x less because the concentration in the kit was 10x lower than  
481 expected). In subsequent experiments with the intended concentration, we have obtained more  
482 efficient mitochondrial retrieval for Twist than we show in Online Table 6.

483

484 For a total of 10 ancient human DNA libraries (5 single-stranded and 5 double-stranded) of  
485 varying genomic complexity and endogenous content (Table 1), we enriched for one and in  
486 almost every case two rounds following the conditions below for each enrichment reagent.  
487 Additionally, we enriched 15 high-complexity libraries and 2 low-complexity libraries for which  
488 we had generated large amounts of shotgun sequence data to further investigate the performance  
489 of each reagent. For these libraries, we used only the originally recommended settings: 1 round  
490 for Twist Ancient DNA, 2 rounds for 1240k, and 2 rounds for Arbor Complete.

491

492 **1240k reagent.** Since the development (5) of the in-solution enrichment technology that is the  
493 basis for the 1240k reagent, we have changed temperature settings in our implementation, but not  
494 buffer composition or volumes. For this study, we started with 1  $\mu\text{g}$  of library and hybridized to  
495 1  $\mu\text{g}$  of single-stranded biotinylated bait in a total volume of 34  $\mu\text{l}$  for at least 16 h at 73  $^{\circ}\text{C}$ . We  
496 bound the biotinylated probes to 30  $\mu\text{l}$  MyOne streptavidin C1 beads in Binding Buffer for 30  
497 min, and washed the beads 5 times with 3 different wash buffers (stringent washes were  
498 performed 3 times at 57  $^{\circ}\text{C}$ ). We melted the library molecules from the probes, precipitated onto  
499 magnetic beads, washed, eluted and amplified for 30 cycles using appropriate primer pairs  
500 (depending on whether they were single- or double-stranded libraries) and Herculase II Fusion  
501 polymerase. We cleaned up the product with 38% SPRI reagent and eluted round 1 in 15  $\mu\text{l}$  TE.  
502 For round 2, we used 5  $\mu\text{l}$  of the round 1 product (usually 500-700 ng total) and hybridized with  
503 500 ng of single-stranded baits again for about 16 h. Capture and washes were identical to round  
504 1, but we eluted the cleaned PCR product in 50  $\mu\text{l}$  usually resulting in 50 - 90 ng/ $\mu\text{l}$  product.

505

506 **Arbor Complete.** We used the ‘myBaits Expert Human Affinities - Complete panel’. The kit  
507 was not commercially available at the time of testing, and we therefore used reagents and buffers  
508 also used for 1240k as recommended by representatives of Daicel Arbor. Experimental settings  
509 are similar to the 1240k settings, with the following adjustments. Hybridization was performed at  
510 70 °C and binding to 30 µl MyOne Streptavidin beads in binding buffer was recommended at 70  
511 °C for 5 min. All washes were identical to 1240k, but the 3 stringent washes were performed at  
512 55 °C and amplification cycles were reduced to 20 in round 1. The entire product was used in  
513 round 2 (except for the 10 libraries we tested 1 and 2 rounds of capture, 1/7th was kept for round  
514 1 indexing PCR and sequencing) and the final amplification was only performed for 12 cycles.  
515 The now commercially available kit is slightly different and the recommended settings can be  
516 found online ([https://arborbiosci.com/wp-](https://arborbiosci.com/wp-content/uploads/2021/03/myBaits_Expert_HumanAffinities_v1.0_Manual.pdf)  
517 [content/uploads/2021/03/myBaits\\_Expert\\_HumanAffinities\\_v1.0\\_Manual.pdf](https://arborbiosci.com/wp-content/uploads/2021/03/myBaits_Expert_HumanAffinities_v1.0_Manual.pdf)).

518  
519 **Twist Ancient DNA.** We explored a range of probe lengths, reagent volumes and temperature  
520 settings to optimize performance for unmultiplexed low-complexity single stranded ancient DNA  
521 libraries. The experimental conditions which used here (which are substantially different from  
522 the protocol optimized by Twist for in-solution enrichment products applied to multiplex modern  
523 DNA) are as follows. We used 1 g of dried library and reconstituted in 7 µl of Universal  
524 Blockers and 5 µl Blocker Solution. In a second plate, we combined 5 µl of Hybridization mix  
525 (standard protocol is 20 µl) with 1 µl of Twist Ancient DNA probes (this is an optimized volume  
526 based on our testing; the standard protocol from Twist for modern high quality DNA specifies 4  
527 µl). We melted the (double-stranded) probes for 5 min at 95 °C and cooled to 4 °C for 5 min.  
528 During the 4 °C cooling of the probes, we incubated libraries and blockers for 5 min at 95 °C. We  
529 next equilibrated both plates to room temperature for 5 min. We added the 6 µl of probe (6.167  
530 µl if mitochondrial DNA probes were added) and hybridization buffer to the 12 µl library and  
531 blocker, mixed, and overlaid with 30 µl Hybridization Enhancer and incubated at 62 °C (standard  
532 is 70 °C) in a thermal cycler for at least 16 h. We used 300 µl Streptavidin beads (standard is 100  
533 µl) and bound for 30 min at room temperature. In manual processing, we next washed beads 4  
534 times with 2 different wash buffers; of these, 3 were stringent washes at 49 °C (standard is 48 °C)  
535 (in automated processing, we performed 7 washes of which 6 were stringent washes at 49 °C; the  
536 automation protocol is available from Twist Biosciences). We amplified from 50% of the bead  
537 slurry with Kapa HiFi HotStart ReadyMix for 23 cycles (standard is fewer cycles) with the  
538 provided primers (ILMN) for single-stranded libraries or indexing primer for double-stranded  
539 libraries in an off-bead PCR. We finished by purifying the PCRs with 1.8x Purification Beads  
540 (standard is 1x) and eluted in 50 µl TE.

541  
542 **Sequencing.** We sequenced enriched and shotgun libraries on HiSeqX10 instruments with 2x101  
543 cycles, and either 2x7 cycles (double-stranded libraries) or 2x8 cycles (single-stranded libraries)  
544 to read the index sequences.

545  
546 **Bioinformatic data processing.** Because the enriched ancient DNA libraries were sequenced in  
547 pools, we needed to demultiplexed sequences which we did based on two different types of  
548 oligonucleotide tags: library-specific barcode pairs (for double-stranded libraries) and index pairs  
549 (for all libraries). We merged paired-end sequences requiring either a minimum of 15 base pair  
550 overlap (with at most one mismatch, base quality $\geq$ 20) or up to three mismatches of lower base  
551 quality. We mapped these sequences to the human genome (*hg19*) using *samse* from *bwa-v0.6.1*



552 (49). We restricted analysis to merged sequences of at least 30 base pairs. For analyses in which  
553 we were interested in relative efficiency of retrieval of molecules at different targeted locations,  
554 we measured coverage prior to removal of PCR duplicated molecules; for other analyses, we  
555 assessed coverage after removal of PCR duplicates. To represent each nucleotide position for  
556 analyses that required SNP genotype calls (Principal Component Analysis and  $f_4$ -statistics), we  
557 chose a random sequence at each location, requiring a mapping and base quality of 10 and 20.

558

559 **Fraction of published ancient DNA data produced by in-solution enrichment:** To compute  
560 the proportion of genome-wide ancient human DNA data for which data had been generated by  
561 1240k enrichment (>70%), we used all published data from version v51 of the Allen Ancient  
562 DNA Resource ([https://reich.hms.harvard.edu/allen-ancient-dna-resource-aadr-downloadable-](https://reich.hms.harvard.edu/allen-ancient-dna-resource-aadr-downloadable-genotypes-present-day-and-ancient-dna-data)  
563 [genotypes-present-day-and-ancient-dna-data](https://reich.hms.harvard.edu/allen-ancient-dna-resource-aadr-downloadable-genotypes-present-day-and-ancient-dna-data)), consisting of compiled records of published  
564 genome-wide ancient human DNA data as of December 22, 2021.

565

566 **Distribution of endogenous DNA proportion in published ancient DNA data:** To compute  
567 the fraction of individuals with proportions of endogenous DNA below different thresholds, we  
568 restricted to published data from our laboratory for which we had at least 15,000 SNPs on  
569 chromosomes 1-22 present targeted by the 1240k reagent, and assessed as passing quality control  
570 either fully ('PASS') or with minor concerns ('QUESTIONABLE'). We restricted to individuals  
571 for which we had an endogenous DNA proportion estimate for at least one library, and  
572 represented each individual by the library with the highest proportion of endogenous DNA.

573

574

575 **Data Availability Statement.** The aligned sequences are available through the European  
576 Nucleotide Archive, accession [to be made available upon publication].

577

578

579 **ACKNOWLEDGMENTS.** We thank Kim Callan, Elizabeth Curtis Lora Iliev, Lijun Qiu, Noah  
580 Workman, and Fatma Zalzal for support in the wet laboratory. We are grateful to Mark  
581 Consugar, Ellie Juarez, Paul Frere, Keith McKenna and Frank Capriglione at Twist Biosciences  
582 who supported the development of the Twist Ancient DNA reagent. We thank Ryan Doan, Steve  
583 Horvath, Iosif Lazaridis, Alissa Mitnik, Vagheesh Narasimhan, and Iñigo Olalde, who advised  
584 on choice of additional SNPs and targeted regions for the Twist reagent, and Ali Akbari who  
585 created the imputed dataset that made it possible to identify SNPs with reduced susceptibility to  
586 capture bias. We thank Jacob Enk and Alison Default at Daicel Arbor who drove the  
587 development of the myBaits Expert Human Affinities capture reagents; and Pontus Skoglund and  
588 Yassine Souilme who advised on SNP choice for that reagent (none of these colleagues had input  
589 into the manuscript). We thank Songül Alpaslan-Roodenberg, Ian Armit, Nihat Erdogan, Julian  
590 Jansen van Rensburg, Carles Lalueza-Fox, Benjamin Neil, Ron Pinhasi, Mary Prendergast, Bob  
591 Sattler and Irina Shingiray for the collaborations that produced the ancient DNA data samples  
592 used for the technical comparisons reported in this study; this paper does not provide information  
593 on archaeological context of the analyzed libraries, although such analyses were previously  
594 reported for some individuals (Table 1). This research was funded by NIH grants GM100233 and  
595 HG012287, by the Allen Discovery Center program, a Paul G. Allen Frontiers Group advised  
596 program of the Paul G. Allen Family Foundation, by John Templeton Foundation grant 61220,  
597 and by the Howard Hughes Medical Institute.

## 598 **Supplementary Information Summary**

599

### 600 ***Supplementary Tables***

601 Supplementary Table 1            Sequencing results on all 27 libraries

602

### 603 ***Supplementary Figures***

604 Supplementary Figure 1            10 library downsampling experiment using coverage as output

605

### 606 ***Supplementary Information***

607 Supp. Information section 1    Content added to Twist Ancient DNA Reagent beyond 1240k

608 Supp. Information section 2    EM Algorithm to Correct for Binomial Sampling Variance

609

### 610 ***Online Tables (large text files, all compressed)***

611 Can be accessed through the following Dropbox link:

612 <https://www.dropbox.com/sh/h024odwt5w1yc37/AAC9jCMhhOncXQRBaWMWOzPla?dl=0>

613

|     |                |                                 |                 |       |
|-----|----------------|---------------------------------|-----------------|-------|
| 614 | Online Table 1 | Twist SNP targets               | 1,352,529 rows  | SNPs  |
| 615 | Online Table 2 | Methylation CpG targets         | 80,000 rows     | bases |
| 616 | Online Table 3 | Human Accelerated Regions (HAR) | 857,339 rows    | bases |
| 617 | Online Table 4 | Gene Resequencing Regions       | 2,577 rows      | bases |
| 618 | Online Table 5 | Mappable Y Chromosome           | 10,446,037 rows | bases |
| 619 | Online Table 6 | Mitochondrial DNA               | 16,569 rows     | bases |
| 620 | Online Table 7 | Statistics at 1000 Genomes SNPs | 81,286,436 rows | SNPs  |



624 **Supplementary Figure 1: 10 library downsampling experiment using coverage as output.**

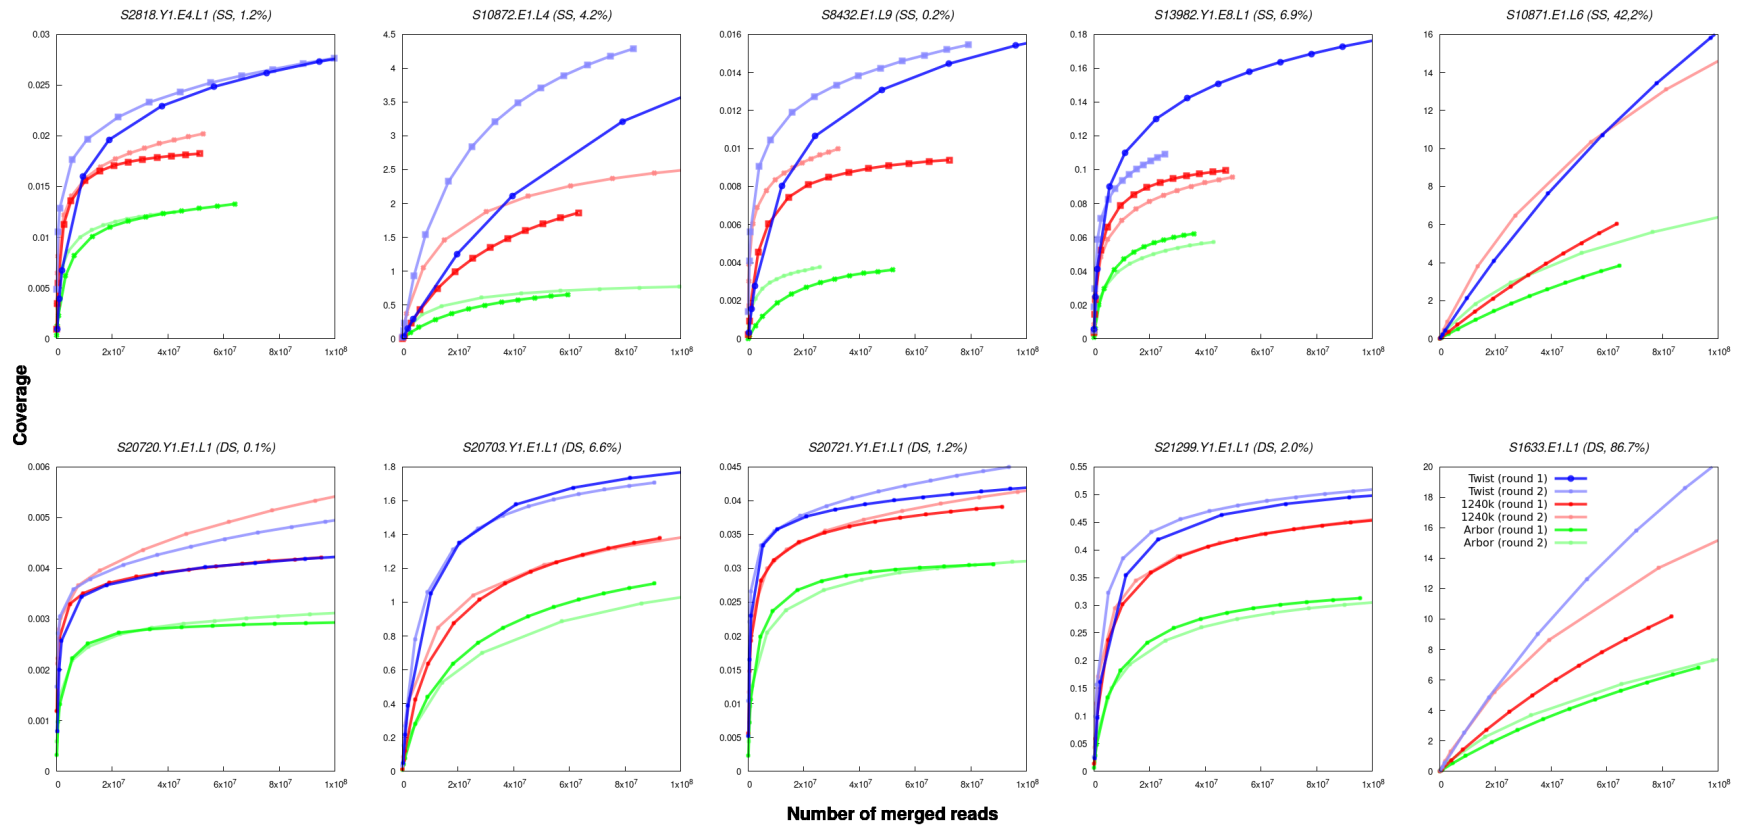

## 625 **Supplementary Section 1: Content added to Twist Ancient DNA Reagent beyond 1240k**

626  
627 *(1a) Adding 94,586 polymorphisms on chromosomes 1-22 and X*

628  
629 For the Twist Ancient DNA reagent, we began by attempting to bait all 1,233,013 SNPs in the 1240k  
630 reagent. We then added additional content to target SNPs of phenotypic significance or SNPs  
631 improving characterization of variation on the Y chromosome.

- 632
- 633 • *“GWAS” SNPs (SNPs associated with phenotypes in Genome-Wide Association Studies)*  
634 We used a list of 236,638 SNPs that are genome-wide significant in one of 4,155 GWAS’s on 558  
635 traits in a diverse set of populations (32). In contrast to the GWAS catalog database (50), this list  
636 only includes SNPs identified in GWAS of 50,000 individuals or more.
  - 637
  - 638 • *“RELATE” SNPs*  
639 We included SNPs estimated to have been under recent selection in any of 26 diverse modern  
640 populations from the 1000 Genomes Project (38) based on distortions in coalescent tree shapes  
641 (33). We selected all 61,308 SNPs with selection p-values  $< 10^{-5}$  in any population.
  - 642
  - 643 • *“Clinvar” SNPs*  
644 We included 32,689 SNPs from the Clinvar database by selecting all variants where the highest  
645 reported allele frequency is  $>1\%$  (34) (<https://www.ncbi.nlm.nih.gov/clinvar/>). These SNPs are  
646 highly enriched for coding, non-synonymous variants.
  - 647
  - 648 • *“Polyfun” SNPs*  
649 We included 75,592 fine-mapped SNPs falling in regions with functional annotations that are  
650 enriched for heritability for a range of complex traits, specifically all SNPs with Posterior Inclusion  
651 Probability of  $>0.1$  (35).

652  
653 *(b) Linkage disequilibrium (LD) pruning to remove genetically correlated SNPs*

654  
655 We pruned the selected SNPs for linkage disequilibrium in 2,261 individuals from the 1000 Genomes  
656 Project. For pruning, we use the PLINK (51) command `--indep-pairwise 1000 100 0.9`.

657  
658 We computed LD for each of the remaining SNPs to the core set of 1240k SNPs using the command `--`  
659 `r2 --ld-window-r2 0.2 --ld-window 10 --ld-window-kb 1000`. We excluded all SNPs with LD greater  
660 than 0.9 to any 1240k SNP.

661  
662 *(c) Quality control*

663  
664 We characterized SNPs from all sources by their dbSNP reference numbers (rs-IDs) as well as their  
665 reference and variant alleles. We filtered out insertion/deletion polymorphisms. We mapped rs-IDs to  
666 chromosome and position and determined alleles using the Ensembl database for genome build  
667 GRCh37 (hg19), accessed through biomaRt (<http://www.biomart.org/>). The hg19 reference sequence  
668 (“hg19\_1000g.fa.gz”) was then used to obtain 52 bp flanking either side. For multi-allelic sites, the  
669 two variants identified in the original sources were kept. Alleles in the hg19 reference sequence were  
670 designated as “ref”, and the alternative alleles as “alt”.

671

672 Table S1.1 shows a record of the SNPs deriving from each of these four methodologies, including the  
673 number retained after the different pruning steps; this identified 94,586 SNPs.

674 **Table S1.1: SNPs selected from each source (there is some overlap, so total is not the sum)**

| Name    | Initial | Not in 1240k | After pruning | R <sup>2</sup> <0.9 | Would keep | Mean allele frequency | Mean R <sup>2</sup> (>0.2) | Mean R <sup>2</sup> (≤0.2) |
|---------|---------|--------------|---------------|---------------------|------------|-----------------------|----------------------------|----------------------------|
| Clinvar | 32705   | 27495        | 20544         | 17262               | 17601      | 0.167                 | 0.7                        | 0.337                      |
| GWAS    | 236638  | 160819       | 66857         | 38540               | 38478      | 0.401                 | 0.79                       | 0.012                      |
| Polyfun | 75592   | 59500        | 42088         | 32430               | 33145      | 0.279                 | 0.72                       | 0.174                      |
| Relate  | 61308   | 49701        | 23228         | 14579               | 14428      | 0.419                 | 0.78                       | 0.008                      |
| Total   | 375408  | 276824       | 140520        | 93812               | 94586      | 0.361                 | 0.77                       | 0.066                      |

675 Note: “Would keep” includes SNPs not in the 1000 Genomes Project and with unclear LD, and excludes SNPs with  
676 mismatching alleles or positions.

677

678 We sought to understand the genomic distribution and other characteristics of the newly added SNPs.  
679 Table S1.2 shows the distribution across chromosomes for each of the four methodologies. Figure S1.1  
680 shows the allele frequency distribution of the variant allele. Figure S1.2 shows the distribution of  
681 maximum R<sup>2</sup> to any 1000 Genomes Project SNPs.

682

683 **Table S2: Number of newly targeted SNPs by chromosome**

| Chromosome | Clinvar | GWAS  | Polyfun | Relate |
|------------|---------|-------|---------|--------|
| 1          | 1496    | 2932  | 3053    | 1052   |
| 2          | 1612    | 4291  | 2773    | 1348   |
| 3          | 890     | 2775  | 2094    | 989    |
| 4          | 693     | 1902  | 1497    | 922    |
| 5          | 922     | 2486  | 1826    | 830    |
| 6          | 908     | 3020  | 1903    | 764    |
| 7          | 741     | 2030  | 1883    | 800    |
| 8          | 668     | 2300  | 1279    | 820    |
| 9          | 907     | 2158  | 1391    | 907    |
| 10         | 684     | 1549  | 1479    | 702    |
| 11         | 1031    | 2066  | 1677    | 714    |
| 12         | 888     | 2019  | 1841    | 644    |
| 13         | 392     | 999   | 909     | 458    |
| 14         | 533     | 1036  | 910     | 527    |
| 15         | 613     | 1517  | 1149    | 476    |
| 16         | 1042    | 1081  | 1433    | 713    |
| 17         | 1095    | 1156  | 1646    | 380    |
| 18         | 341     | 785   | 771     | 379    |
| 19         | 936     | 607   | 1557    | 307    |
| 20         | 464     | 1204  | 1098    | 301    |
| 21         | 324     | 80    | 410     | 192    |
| 22         | 378     | 485   | 567     | 203    |
| X          | 43      | NA    | NA      | NA     |
| Total      | 17601   | 38478 | 33146   | 14428  |

684 **Figure S1.1: Allele frequency distribution by source of newly added SNPs**

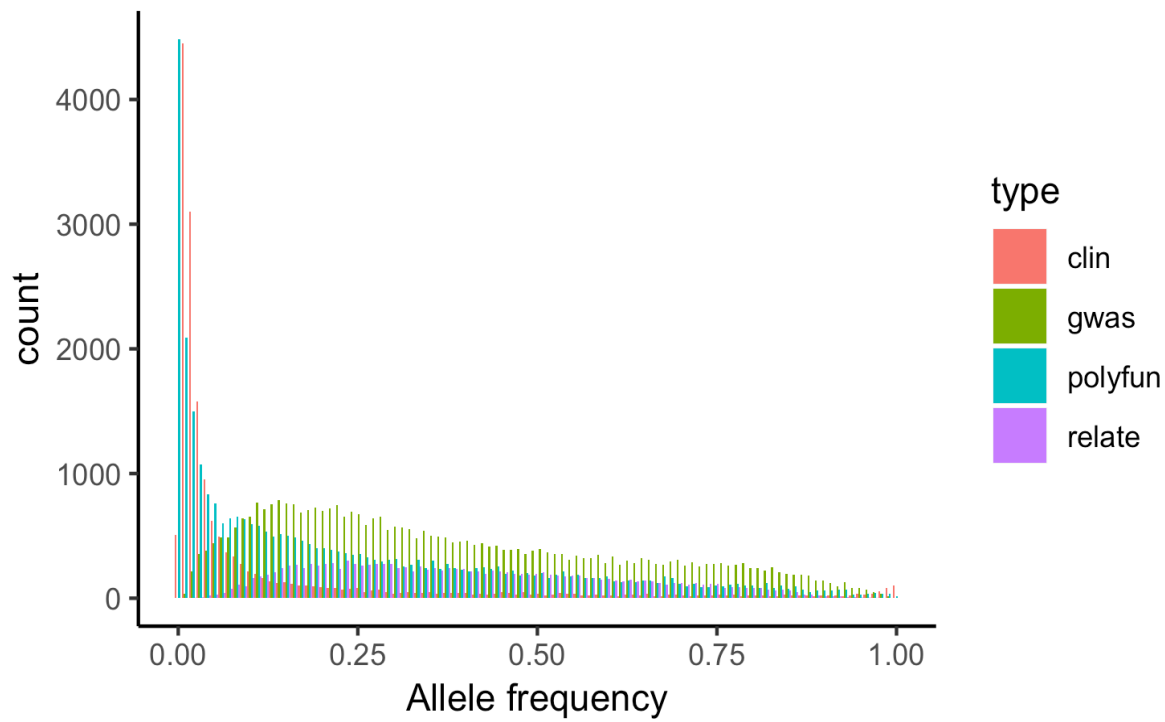

685 **Figure S1.2: Linkage disequilibrium distribution by source. All SNPs with highest LD<0.2 set to 0.**

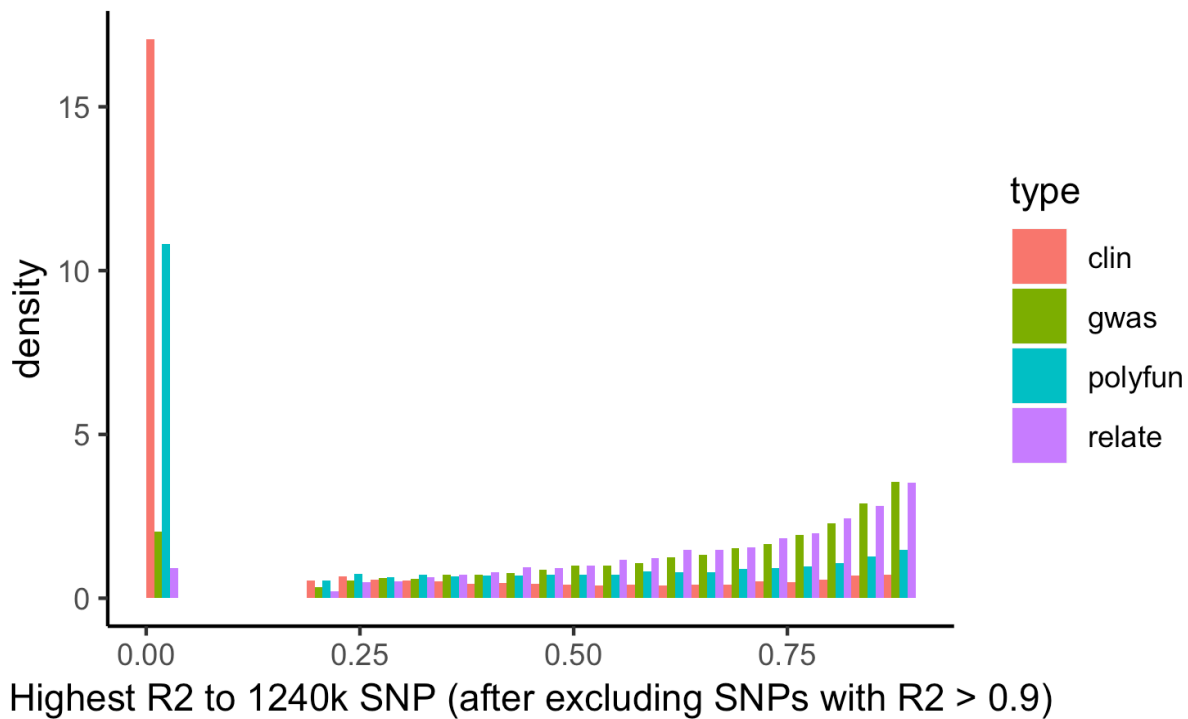

686 Finally, we manually added in 15 phenotypically important multi-allelic polymorphisms and 6  
 687 insertion/deletion targets where we tiled both alternative alleles (Table S1.3).  
 688  
 689

**Table S1.3: Manual addition of 15 multiallelic SNPs and 6 insertion/deletion targets**

| Target          | Ch r | Ascertainment                                  | Target type                              | Position of site in hg19 (start for Indel) | Beginning of targeted sequence in hg19 | End of targeted sequence in hg19 | Ref | Var(s) | Tiled Oligo-nucleotide                                                                                                                  |
|-----------------|------|------------------------------------------------|------------------------------------------|--------------------------------------------|----------------------------------------|----------------------------------|-----|--------|-----------------------------------------------------------------------------------------------------------------------------------------|
| rs77931234      | 1    | Medium-chain acyl-CoA dehydrogenase deficiency | Multiallelic position (design reference) | 76226846                                   | 76226794                               | 76226898                         | A   | C,G,T  | TTTTAATTCTAGC<br>ACCAAGCAATATC<br>ATTATGCTGGCTG<br>AAATGGCAATGTA<br>AGTTGAACAGCT<br>AGAATGAGTTACC<br>AGAGAGCAGCTTG<br>GGAGGTTGATTG      |
| snp_2_136608745 | 2    | lactase persistence                            | Multiallelic position (design reference) | 136608745                                  | 136608693                              | 136608797                        | A   | C,T    | TTGTAGGGTCTAAG<br>TACATTTTCCTGA<br>ATGAAAGGTATTA<br>AATGGTAACTTTTCG<br>TCTTTATGCACTCT<br>ATAAACTATGACG<br>TGATCGTCTCCGTC<br>TAACAACTA   |
| rs75030631      | 5    | Spinal Muscular Atrophy                        | Multiallelic position (design reference) | 70220935                                   | 70220883                               | 70220987                         | C   | G,A    | ACTCTTAAGAAGG<br>GACGGGGCCCCAC<br>GCTGCGCACCCCG<br>GGGTTTGGTATGGA<br>GATGAGCAGCGGC<br>GGCAGTGGTGCGG<br>GGTCCCGGAGCA<br>GGAGGATTCGGTG    |
| rs1800562       | 6    | Hereditary Hemochromatosis                     | Multiallelic position (design reference) | 26093141                                   | 26093089                               | 26093193                         | G   | A,T    | CAGGGCTGGATAA<br>CCTTGGCTGTACCC<br>CTGGGGAAAGGC<br>AGAGATATACGTT<br>CCAGGTGGAGCAC<br>CCAGGCCTGGATC<br>AGCCCTCATTGTG<br>ATCTGGGGTATG     |
| rs111033171     | 9    | Familial Dysautonomia                          | Multiallelic position (design reference) | 111662096                                  | 111662044                              | 111662148                        | A   | G,T    | ATTGCTTCACACA<br>TAAATCACAAGCT<br>AACTAGTCGCAAA<br>CAGTACAATGGCT<br>CTTACTTGCCAAC<br>CACTCCGAATCTG<br>AGCTAAAACCGG<br>GCTCGATGATG       |
| rs33985472      | 11   | $\beta$ -Thalassemia                           | Multiallelic position (design reference) | 5246715                                    | 5246663                                | 5246767                          | T   | C,G    | TAAAAATTTTCAGA<br>AATAATTTAAATAC<br>ATCATTGCAATGA<br>AAATAAATGTTTGT<br>TATTAGGCAGAAT<br>CCAGATGCTCAAG<br>GCCCTTCATAATAT<br>CCCCAGTTTA   |
| rs35004220      | 11   | $\beta$ -Thalassemia                           | Multiallelic position (design reference) | 5248050                                    | 5247998                                | 5248102                          | C   | T,A    | ACCTCTGGGTCCAA<br>GGGTAGACCACCA<br>GCAGCCTAAGGGT<br>GGGAAAAATAGACA<br>AATAGGCAGAGAG<br>AGTCAGTGCTATC<br>AGAAACCCAAGAG<br>TCTTCTGTCT     |
| rs80338863      | 11   | Smith-Lemli-Opitz syndrome                     | Multiallelic position (design reference) | 71148990                                   | 71148938                               | 71149042                         | C   | G,T    | TGCTTTCAGGTAC<br>CAGGTTTGGTTCCA<br>GAAGAAGTCAATC<br>ACGTAGATGGCTT<br>GCAAGACAGAAGC<br>AGCCGTGACCAC<br>CCCCGCCCTCCTG<br>GGGCCCCATG       |
| rs5030858       | 12   | Phenylketonuria                                | Multiallelic position (design reference) | 103234271                                  | 103234219                              | 103234323                        | G   | A,C    | TCCAAGACCTCAAT<br>CCTTGGGTGTATG<br>GGTCTAGCGAAC<br>TGAGAAGGGCCCA<br>GGTATTGTGGCAG<br>CAAAGTTCCTAAG<br>ACCAAAACACAG<br>GCTTGAGTGAAG      |
| snp_15_28496195 | 15   | pigmentation                                   | Multiallelic position (design reference) | 28496195                                   | 28496143                               | 28496247                         | A   | G,C    | ATGTCCCATACAG<br>GACCCACGTGCC<br>ACAGGAACCAAAA<br>AGTCACATGAGC<br>CAGGATGAAGACA<br>CAGGAGACAACCT<br>GTGTGGACAGCAC<br>AGAGCCACCTGCC<br>G |
| snp_16_89383725 | 16   | pigmentation                                   | Multiallelic position (design reference) | 89383725                                   | 89383673                               | 89383777                         | T   | C,G    | ACAGGAATGGCAG<br>CTTTGAGCAGGAA<br>GGAGAACAGAGAA<br>GGGTCAAGCACTT<br>GGTAGTGGCAGAA<br>AGGGACGCATGGC                                      |



|                       |    |                       |                                           |           |           |           |                                                                          |          |                                                                                                                                      |
|-----------------------|----|-----------------------|-------------------------------------------|-----------|-----------|-----------|--------------------------------------------------------------------------|----------|--------------------------------------------------------------------------------------------------------------------------------------|
|                       |    |                       |                                           |           |           |           |                                                                          |          | CTAGGGTGTGGCT<br>GTGTTCTGGGTGGC                                                                                                      |
| rs3212355             | 16 | pigmentation          | Multiallelic position (design reference)  | 89984378  | 89984326  | 89984430  | C                                                                        | T,G      | GAGTGAACCCAGG<br>AAGATGCCTGCAG<br>TGGGTGCCAGGGC<br>CCCTCTCCACCCTG<br>CCTGCTGGGCTTCG<br>GGGCCACGCCCGA<br>CTGCTGGAACGG<br>CCTGCGGAGCAC |
| snp_16_89986122       | 16 | pigmentation          | Multiallelic position (design reference)  | 89986122  | 89986070  | 89986174  | C                                                                        | A,T      | TGGGCGCCATCGC<br>CGTGGACCGCTAC<br>ATCTCCATCTCTA<br>CGCACTGCGCTATC<br>ACAGCATCGTGAC<br>CCTGCGCGGGCG<br>CGGGAGCGCTTG<br>CGCCATCTGGG    |
| snp_16_90024206       | 16 | pigmentation          | Multiallelic position (design reference)  | 90024206  | 90024154  | 90024258  | A                                                                        | G,T      | CTCTCTAGCGGT<br>GGTCTCTCTCGG<br>CCTCAGGGGCTGA<br>GGTAGAAGGGCTC<br>GAGACAGCCAGGG<br>TGAAGAGCGGGC<br>CTCACCACCTGG<br>GGAGGTTTCCC       |
| snp_20_32665748       | 20 | pigmentation          | Multiallelic position (design reference)  | 32665748  | 32665696  | 32665800  | A                                                                        | G,T      | GTTCACATTFTA<br>CCCTGTAGGAAA<br>TCGAGGCTCAGAA<br>AGCTGAGTGGCT<br>TGCTCAGGGATC<br>AGCTCGTAGGGAC<br>TGAGCCAGGGTTG<br>GAGTCCAGACTGA     |
| rs333                 | 3  | HIV-AIDS immunity     | Insertion/deletion (design both versions) | 46414947  | 46414908  | 46415012  | GTC<br>AGT<br>ATC<br>AAT<br>TCT<br>GGA<br>AGA<br>ATT<br>TCC<br>AGA<br>CA | deletion | AAGGCTTCATTAC<br>ACCTGCAGCTTCA<br>TTTTCCATACAGTC<br>AGTATCAAATCTGG<br>AAGAATTCAGCA<br>CATTAAGATAGT<br>CATCTTGGGGCTGG<br>TCCTGCCGC    |
| rs333.deletion        | 3  | HIV-AIDS immunity     | Insertion/deletion (design both versions) | 46414947  | 46414893  | 46415029  | GTC<br>AGT<br>ATC<br>AAT<br>TCT<br>GGA<br>AGA<br>ATT<br>TCC<br>AGA<br>CA | deletion | CCAGATCTCAAAA<br>AGAAGGTCTCATT<br>ACACCTGCAGCTCT<br>CATTTCCATACAT<br>TAAAGATAGTATC<br>CTTGGGGCTGGTCC<br>TGCCGCTGGTTGC<br>ATGGTCATC   |
| rs113993960           | 7  | Cystic Fibrosis       | Insertion/deletion (design both versions) | 117199646 | 117199594 | 117199698 | CTT                                                                      | deletion | TCTGTCTCAGTT<br>TCCTGGATTATGCC<br>TGCCACCATAAA<br>GAAAATATCATCTT<br>TGGGTGTTCTATG<br>ATGAATATAGATA<br>CAGAAGCGTCTATC<br>AAAGCATGCC   |
| rs113993960.deletion  | 7  | Cystic Fibrosis       | Insertion/deletion (design both versions) | 117199646 | 117199593 | 117199700 | CTT                                                                      | deletion | TTCTGTTCTCAGTT<br>TTCTGGATTATGC<br>CTGGACCATTAA<br>AGAAAATATCATT<br>GGTGTTCCTATGA<br>TGAATATAGATAC<br>AGAAGCGTCTATCA<br>AAGCATGCCAA  |
| rs387906309           | 15 | Tay-Sachs             | Insertion/deletion (design both versions) | 72638921  | 72638870  | 72638974  | insertion                                                                | GATA     | TCAAATGCCAGGG<br>GTTCCACTATGTAG<br>AAATCTTCCAGTC<br>AGGGCCATAGGAT<br>ATACGGTTCAGGT<br>ACCAGGGGCGAGA<br>GAGAAGGCCCGG<br>AAGCCGGCCTTG  |
| rs387906309.insertion | 15 | Tay-Sachs             | Insertion/deletion (design both versions) | 72638921  | 72638872  | 72638972  | insertion                                                                | GATA     | AAATGCCAGGGGT<br>TCCACTATGTAGAA<br>ATCTTCCAGTCAG<br>GGCCATAGGATAG<br>ATATACGGTTCAG<br>GTACCAGGGGCA<br>GAGAGAAGGGCCC<br>GGAAGCCGGCCT  |
| rs41474145            | 16 | $\alpha$ -Thalassemia | Insertion/deletion (design both versions) | 223008    | 222956    | 223060    | TGA<br>GG                                                                | deletion | GGTAAGGTCCGC<br>GCGCAGCTGGCG<br>AGTATGGTGGGA<br>GGCCCTGGAGAGG<br>TGAGGCTCCCTCCC<br>CTGCTCCGACCCGG<br>GCTCCTGCCCGCC<br>CGGACCCACAG    |

|                      |    |                       |                                           |           |           |           |                          |          |                                                                                                                                   |
|----------------------|----|-----------------------|-------------------------------------------|-----------|-----------|-----------|--------------------------|----------|-----------------------------------------------------------------------------------------------------------------------------------|
| rs41474145.deletion  | 16 | $\alpha$ -Thalassemia | Insertion/deletion (design both versions) | 223008    | 222953    | 223062    | TGA<br>GG                | deletion | CTGGGGTAAGTTC<br>GGCGGCACGCTG<br>GGAGTATGGTGC<br>GGAGGCCCTGGAG<br>AGGCTCCCTCCCT<br>GCTCCGACCCGGG<br>CTCCTCGCCCGCC<br>GGACCCACAGGC |
| rs63751471           | 16 | $\alpha$ -Thalassemia | Insertion/deletion (design both versions) | 223510    | 223463    | 223567    | CTC<br>CCC<br>GCC<br>GAG | deletion | CTGCACAGCTCCTA<br>AGCCTGCTGCT<br>GGTACCTGGCC<br>GCCACTCCCGC<br>CGAGTTCACCCCTG<br>CGGTGCAGCCTCC<br>CTGGACAAGTCT<br>GGCTTCTG        |
| rs63751471.deletion  | 16 | $\alpha$ -Thalassemia | Insertion/deletion (design both versions) | 223510    | 223463    | 223579    | CTC<br>CCC<br>GCC<br>GAG | deletion | CTGCACAGCTCCTA<br>AGCCTGCTGCT<br>GGTACCTGGCC<br>GCCACTTCACCC<br>TGCGGTGCAGCCT<br>CCCTGGACAAGTTC<br>CTGGCTTGTGAG<br>CACCGTGC       |
| rs587776730          | X  | Favism                | Insertion/deletion (design both versions) | 153761232 | 153761189 | 153761293 | C                        | deletion | ACGGCTGAAAAG<br>TGGCGGTGGTGA<br>CCCGGGGGCACC<br>GTGGGGTGTCCA<br>GGTACCCTTTGGT<br>GCCTCGCCCTTCC<br>ATCGGGTTCCCA<br>CGTACTGGCC      |
| rs587776730.deletion | X  | Favism                | Insertion/deletion (design both versions) | 153761232 | 153761177 | 153761305 | C                        | deletion | ACATAGAGGACGA<br>CGGTGCAAAAGT<br>GGCGTGGTGGAC<br>CCCGGGGCACCG<br>TGCCCTGCCCTCT<br>CCATCGGGTTCC<br>CACGTAAGTGGCC<br>AGGACCACATTG   |

690 (1b) Targeting 81,925 polymorphisms on chromosome Y

691

692 To identify Y chromosome targets, we started with 32,670 chromosome Y SNPs from the 1240k  
693 reagent. These had been identified by starting with ISOGG 9.77 SNPs (<https://isogg.org/>), and then  
694 merging with SNPs identified as polymorphic in the Simons Genome Diversity Panel (52, 53).

695

696 For our redesign, we added in 69,991 Y SNPs from the ISOGG Y SNP index version 14.199  
697 downloaded Nov. 5 (<https://isogg.org/>). To obtain this list, we started with 88,795 polymorphisms in  
698 the download, removed ones with duplicate positions, and restricted to true SNPs that are biallelic for  
699 the alleles A/C/G/T.

700

701 After merging and removing duplicates, this generated 88,023 SNPs. We reduced this to 81,925 by  
702 removing SNPs monomorphic in the existing 1240k enrichment dataset, or that had coverage counts in  
703 that dataset of <10%.

704

705 In contrast to the 94,586 SNPs identified in Section 1a which represent a supplement to the 1240k  
706 content on chromosomes 1-22 and X, for the Y chromosome the 81,925 SNPs we discuss are a  
707 replacement of the 1240k content on chromosome Y.

708

709 (1c) Final count of SNPs

710

711 The total number of SNPs targeted for the reagent is:

712

|     |           |                                                               |
|-----|-----------|---------------------------------------------------------------|
| 713 | 1,200,343 | 1240k content on chromosomes 1-22 and Y                       |
| 714 | 94,586    | Newly designed phenotypic discussed in Section 1a             |
| 715 | 81,925    | Fully redesigned Y chromosome content discussed in Section 1b |
| 716 | 1,376,854 | Total                                                         |

717

718 For each targeted SNP, we randomly selected a third allele to represent each position and flanked it  
719 52bp on either side according to the sequence from the hg19 reference genome. We then mapped the  
720 sequence to hg19. After removing oligonucleotides that mapped unreliably with a score of MAPQ<23,  
721 or that mapped to a location that disagreed with the recorded positions, or that was duplicated in its  
722 sequence compared to another in the dataset, or that failed other quality controls, our design file  
723 targeted 1,352,535 SNPs.

724

725 *(1d) Tiled regions (with either 1x or 2x tiling)*

726

727 Beyond SNP targeting, we also added in probes to bait additional genomics regions.

728

729 • *“Methylation” targets*

730 We are grateful to Steve Horvath and Vagheesh Narasimhan for providing us with the coordinates  
731 of 40,000 CpG dinucleotides chosen to be locations where methylation rates are correlated to the  
732 skeletally determined ages of ancient individuals. These CpG dinucleotides are also ones where  
733 methylation rates have been shown to be well-correlated to the ages of living individuals. Of these  
734 targets, we successfully designed single probes for 39,886 (we did not design probes for the others  
735 due to repetitive flanking sequence).

736

737 • *“Human Accelerated Region (HAR)” targets*

738 We are grateful to Ryan Doan for sharing with us a list of 3,171 Human Accelerated Regions  
739 (HARs) spanning 857,339 nucleotides. We tiled each of these regions twice (with 80bp probes  
740 overlapping every 40bp).

741

742 • *“Gene resequencing” targets*

743 This includes 9 contiguous regions in 3 genes, specified in hg19 coordinates. The segments target  
744 SNPs believed to contribute to  $\beta$ -thalassemia (chr. 11: 5247022-5247193 and 5248114-5248429),  
745  $\alpha$ -thalassemia (chr. 16: 222873-223052 and 223469-223733), and favism (chr. X: 153220145-  
746 153220335, 153760378-153761377, 153761761-153761889, 153763362-153763532, 153764171-  
747 153764423, and 153774226-153774316). The SNPs are rs34690599, rs34451549, rs35724775,  
748 rs33915217, rs33971440, rs33960103, rs33986703, rs34716011, rs63750783, rs334,  
749 rs34598529, rs33944208, rs111033603, rs281864819, rs41474145, rs63750404, rs63751471,  
750 rs33987053, rs41397847, rs41464951, rs63751269, rs137852348, rs137852344, rs72554664,  
751 rs72554665, rs72554665, rs137852324, rs137852317, rs137852337, rs2230037, rs137852336,  
752 rs137852323, rs137852335, rs137852316, rs137852316, rs137852321, rs137852334, rs137852320,  
753 rs137852322, rs2230036, rs387906468, rs137852329, rs137852345, rs137852333, rs137852342,  
754 rs5030869, rs587776730, rs76723693, rs137852347, rs137852339, rs137852327, rs74575103,  
755 rs137852318, rs137852346, rs137852328, rs137852328, rs137852319, rs137852326, rs137852332,  
756 rs137852332, rs137852330, rs5030868, rs267606836, rs5030872, rs5030872, rs137852343,  
757 rs137852331, rs137852314, rs2515904, rs137852313, rs137852341, rs1050829, rs137852349,  
758 rs1050828, rs137852315, rs76645461, and rs78478128. We tiled segments with 80bp probes  
759 staggered every 40bp.

## 760 Supplementary Section 2: EM Algorithm to Correct for Binomial Sampling Variance

761  
762 The problem we wish to solve is that we have empirical counts of reference and variant alleles for  
763 large numbers of known or highly probable heterozygous positions. Here we describe how we  
764 deconvolve the noise to learn the underlying distribution of reference bias.

765  
766 We consider a set of reference and variance counts (typically summing to 100 or more). At SNP  $k$  we  
767 observe  $a_k$  reference and  $b_k$  variant alleles. We suppose the ‘true’ allele frequency of reference is  $z_k = z$   
768 which we can think of as the frequency we would observe if the coverage were infinite. We wish to  
769 learn the probability distribution of  $z$ . We will ignore (in this note) the case that the observed counts  
770 are not polymorphic, so we assume  $a_k, b_k \geq 1$ .

771  
772 Let us model  $z_k$  as lying on a mesh; for instance,  $z_k = i/100$  for some  $i = 1 \dots 99$ . We propose to estimate  
773  $p_i = (z_k = i/100)$ . Write  $\alpha_i = i/100$ ;  $\beta_i = (100-i)/100$ . We see that the log likelihood of our observation  
774 for SNP  $k$  is:

$$775 \quad \mathcal{L}(k) = \log \left( \sum_i \alpha_i^{a_k} \beta_i^{b_k} + (a_k + b_k) \log 2 \right)$$

776  
777 The last term is not essential, but good technique is to score against some random model; here that  $a_k$  is  
778 from tossing a fair coin toss (50% probability heads). The overall log likelihood is:

$$779 \quad \mathcal{L} = \mathcal{L}(\mathbf{p}) = \sum_i \mathcal{L}(k)$$

780  
781  $\mathcal{L}$  is easily maximized by an EM algorithm. Write:

$$782 \quad l(i,k) = \log p_i + a_k \log \alpha_i + b_k \log \beta_i$$

$$783 \quad lmax_k = \max_i l(i,k)$$

$$784 \quad \theta(i,k) = \exp(l(i,k) - lmax_k)$$

$$785 \quad \gamma(i,k) = \frac{\theta(i,k)}{\sum_j \theta(j,k)}$$

786  
787 Thus,  $\gamma(i,k)$  is the posterior probability that  $z_k = \alpha_i$ . Reestimates are now simply:

$$788 \quad \hat{p}_i = \sum_k \gamma(i,k) / N$$

789  
790 where  $N$  is the number of SNPs. Standard EM shows that:

$$791 \quad \mathcal{L}(\hat{\mathbf{p}}) \geq \mathcal{L}(\mathbf{p})$$

792  
793 We iterate until convergence. We implemented this in C to produce the inferences in Figure 5.

## Literature Cited (Main manuscript)

1. H. A. Burbano *et al.*, Targeted investigation of the Neandertal genome by array-based sequence capture. *Science* **328**, 723-725 (2010).
2. A. Gnirke *et al.*, Solution hybrid selection with ultra-long oligonucleotides for massively parallel targeted sequencing. *Nat Biotechnol* **27**, 182-189 (2009).
3. J. K. Teer, J. C. Mullikin, Exome sequencing: the sweet spot before whole genomes. *Hum Mol Genet* **19**, R145-151 (2010).
4. M. L. Carpenter *et al.*, Pulling out the 1%: whole-genome capture for the targeted enrichment of ancient DNA sequencing libraries. *Am J Hum Genet* **93**, 852-864 (2013).
5. Q. Fu *et al.*, DNA analysis of an early modern human from Tianyuan Cave, China. *Proc Natl Acad Sci U S A* **110**, 2223-2227 (2013).
6. T. Maricic, M. Whitten, S. Paabo, Multiplexed DNA sequence capture of mitochondrial genomes using PCR products. *PLoS One* **5**, e14004 (2010).
7. S. Castellano *et al.*, Patterns of coding variation in the complete exomes of three Neandertals. *Proc Natl Acad Sci U S A* **111**, 6666-6671 (2014).
8. Q. Fu *et al.*, An early modern human from Romania with a recent Neanderthal ancestor. *Nature* **524**, 216-219 (2015).
9. W. Haak *et al.*, Massive migration from the steppe was a source for Indo-European languages in Europe. *Nature* **522**, 207-211 (2015).
10. I. Mathieson *et al.*, Genome-wide patterns of selection in 230 ancient Eurasians. *Nature* **528**, 499-503 (2015).
11. I. Lazaridis *et al.*, Genomic insights into the origin of farming in the ancient Near East. *Nature* **536**, 419-424 (2016).
12. M. Lipson *et al.*, Ancient DNA and deep population structure in sub-Saharan African foragers. *Nature In press* (2022).
13. M. Lipson *et al.*, Ancient West African foragers in the context of African population history. *Nature* **577**, 665-670 (2020).
14. I. Mathieson *et al.*, The genomic history of southeastern Europe. *Nature* **555**, 197-203 (2018).
15. I. Olalde *et al.*, The genomic history of the Iberian Peninsula over the past 8000 years. *Science* **363**, 1230-1234 (2019).
16. N. Patterson *et al.*, Ancient admixture in human history. *Genetics* **192**, 1065-1093 (2012).
17. N. Nakatsuka *et al.*, The promise of discovering population-specific disease-associated genes in South Asia. *Nat. Genet.* **49**, 1403-1407 (2017).
18. I. Lazaridis *et al.*, Ancient human genomes suggest three ancestral populations for present-day Europeans. *Nature* **513**, 409-413 (2014).
19. S. Lopez *et al.*, Evidence of the interplay of genetics and culture in Ethiopia. *Nat Commun* **12**, 3581 (2021).
20. P. Flegontov *et al.*, Paleo-Eskimo genetic legacy across North America. *bioRxiv* (2017).
21. C. Jeong *et al.*, The genetic history of admixture across inner Eurasia. *Nat Ecol Evol* **3**, 966-976 (2019).
22. C. C. Wang *et al.*, Genomic insights into the formation of human populations in East Asia. *Nature* **591**, 413-419 (2021).
23. P. Skoglund *et al.*, Genomic insights into the peopling of the Southwest Pacific. *Nature* **538**, 510-513 (2016).
24. W. Kutanan *et al.*, Reconstructing the Human Genetic History of Mainland Southeast Asia: Insights from Genome-Wide Data from Thailand and Laos. *Mol Biol Evol* **38**, 3459-3477 (2021).
25. J. K. Pickrell *et al.*, The genetic prehistory of southern Africa. *Nat Commun* **3**, 1143 (2012).
26. M. Lipson *et al.*, Population Turnover in Remote Oceania Shortly after Initial Settlement. *Curr Biol* **28**, 1157-1165 e1157 (2018).

27. P. Qin, M. Stoneking, Denisovan Ancestry in East Eurasian and Native American Populations. *Mol Biol Evol* **32**, 2665-2674 (2015).
28. C. Barbieri *et al.*, The Current Genomic Landscape of Western South America: Andes, Amazonia, and Pacific Coast. *Mol Biol Evol* **36**, 2698-2713 (2019).
29. A. Bergstrom *et al.*, Insights into human genetic variation and population history from 929 diverse genomes. *Science* **367** (2020).
30. D. M. Behar *et al.*, A "Copernican" reassessment of the human mitochondrial DNA tree from its root. *Am J Hum Genet* **90**, 675-684 (2012).
31. R. E. Green *et al.*, A complete Neandertal mitochondrial genome sequence determined by high-throughput sequencing. *Cell* **134**, 416-426 (2008).

### Literature Cited (Supplementary Sections)

32. K. Watanabe *et al.*, A global overview of pleiotropy and genetic architecture in complex traits. *Nat Genet* **51**, 1339-1348 (2019).
33. L. Speidel, M. Forest, S. Shi, S. R. Myers, A method for genome-wide genealogy estimation for thousands of samples. *Nat Genet* **51**, 1321-1329 (2019).
34. M. J. Landrum *et al.*, ClinVar: improvements to accessing data. *Nucleic acids research* **48**, D835-D844 (2020).
35. O. Weissbrod *et al.*, Functionally informed fine-mapping and polygenic localization of complex trait heritability. *Nat Genet* **52**, 1355-1363 (2020).
36. P. Flegontov *et al.*, Palaeo-Eskimo genetic ancestry and the peopling of Chukotka and North America. *Nature* **570**, 236-240 (2019).
37. D. Gokhman *et al.*, Differential DNA methylation of vocal and facial anatomy genes in modern humans. *Nat Commun* **11**, 1189 (2020).
38. A. Auton *et al.*, A global reference for human genetic variation. *Nature* **526**, 68-74 (2015).
39. C. Fowler *et al.*, A high-resolution picture of kinship practices in an Early Neolithic tomb. *Nature* 10.1038/s41586-021-04241-4 (2021).
40. T. Gunther, C. Nettelblad, The presence and impact of reference bias on population genomic studies of prehistoric human populations. *PLoS Genet* **15**, e1008302 (2019).
41. R. Martiniano, E. Garrison, E. R. Jones, A. Manica, R. Durbin, Removing reference bias and improving indel calling in ancient DNA data analysis by mapping to a sequence variation graph. *Genome Biol* **21**, 250 (2020).
42. S. Rubinacci, D. M. Ribeiro, R. J. Hofmeister, O. Delaneau, Efficient phasing and imputation of low-coverage sequencing data using large reference panels. *Nat Genet* **53**, 120-126 (2021).
43. N. Patterson *et al.*, Large-scale migration into Britain during the Middle to Late Bronze Age. *Nature* 10.1038/s41586-021-04287-4 (2021).
44. J. Dabney *et al.*, Complete mitochondrial genome sequence of a Middle Pleistocene cave bear reconstructed from ultrashort DNA fragments. *Proc Natl Acad Sci U S A* **110**, 15758-15763 (2013).
45. P. Korlevic *et al.*, Reducing microbial and human contamination in DNA extractions from ancient bones and teeth. *Biotechniques* **59**, 87-93 (2015).
46. N. Rohland, I. Glocke, A. Aximu-Petri, M. Meyer, Extraction of highly degraded DNA from ancient bones, teeth and sediments for high-throughput sequencing. *Nat Protoc* **13**, 2447-2461 (2018).
47. M.-T. Gansauge, A. Aximu-Petri, S. Nagel, M. Meyer, Manual and automated preparation of single-stranded DNA libraries for the sequencing of DNA from ancient biological remains and other sources of highly degraded DNA. *Nature Protocols* **15**, 2279-2300 (2020).
48. N. Rohland, E. Harney, S. Mallick, S. Nordenfelt, D. Reich, Partial uracil-DNA-glycosylase treatment for screening of ancient DNA. *Philos Trans R Soc Lond B Biol Sci* **370**, 20130624 (2015).

49. H. Li, R. Durbin, Fast and accurate long-read alignment with Burrows-Wheeler transform. *Bioinformatics* **26**, 589-595 (2010).
50. D. Welter *et al.*, The NHGRI GWAS Catalog, a curated resource of SNP-trait associations. *Nucleic acids research* **42**, D1001-1006 (2014).
51. S. Purcell *et al.*, PLINK: a tool set for whole-genome association and population-based linkage analyses. *Am J Hum Genet* **81**, 559-575 (2007).
52. Q. Fu *et al.*, An early modern human from Romania with a recent Neanderthal ancestor. *Nature* **524**, 216-219 (2015).
53. S. Mallick *et al.*, The Simons Genome Diversity Project: 300 genomes from 142 diverse populations. *Nature* **538**, 201-206 (2016).
